# Supplementary material for: Geochronological imaging of an episodically constructed subvolcanic batholith: U-Pb in zircon chronochemistry of the Altiplano-Puna Volcanic Complex of the Central Andes
Source: Oxford University Press journal article supplement (doi:10.1130/ges01258.1), 2016-05-27
Supplement: 1258_supptab1.xlsx [file 1258_supptab1.xlsx]

## Sheet: Kern et al. U-Pb zircon data
Supplementary table 1: APVC ignimbrite U-Pb zircon results
	sample	grain	spot	Core/Rim	238U/206Pb	1σ 238U/206Pb	207Pb/206Pb	1σ 207Pb/206Pb	Correlation of TW Concordia Ellipses	204Pb/206Pb	1σ 204Pb/206 Pb	% 206Pb*	206Pb/238U age [Ma]	1σ 206Pb/238U age [Ma]	U (ppm)	U/Th	UO/U	Comments
Artola	Artola
2011_08_22Aug\ 83002@1.ais	83002	1	1	R	613.497	32.0298	0.0952	0.00905	-0.225764	0.005003	0.002238	93.7364	9.93226	0.566917	268.607	2.76714	7.405
2011_08_22Aug\ 83002@2.ais	83002	2	1	R	669.792	30.1474	0.06299	0.00227	0.0286861	0.003241	0.0006959	97.8544	9.46985	0.434479	2044.83	1.03138	7.44
2011_08_22Aug\ 83002@3.ais	83002	3	1	R	646.412	37.6064	0.08026	0.00727	-0.218031	0.006083	0.003514	95.6482	9.62194	0.591136	150.226	2.78158	7.364
2011_08_22Aug\ 83002@4.ais	83002	4	1	R	618.812	33.2765	0.06996	0.00462	-0.114333	0.002796	0.001541	96.9657	10.185	0.565099	342.35	2.96798	7.21
2011_08_22Aug\ 83002@5.ais	83002	5	1	R	697.837	31.41	0.05915	0.00506	0.0210999	0.003485	0.001559	98.3512	9.17075	0.41992	425.981	3.00079	7.497
2011_08_22Aug\ 83002@6.ais	83002	6	1	R	668.896	35.3911	0.0718	0.00799	-0.0762926	0.003106	0.001712	96.7298	9.40493	0.52006	308.98	2.64768	7.372
2011_08_22Aug\ 83002@7.ais	83002	7	1	R	629.723	34.262	0.0748	0.00651	0.123927	0.00549	0.002652	96.3519	9.93502	0.562939	223.702	1.73405	7.316
2011_08_22Aug\ 83002@8.ais	83002	8	1	R	614.251	33.9951	0.08224	0.00444	-0.10641	0.00331	0.001719	95.3966	10.0981	0.586464	314.748	3.50486	7.274
2011_08_22Aug\ 83002@9.ais	83002	9	1	R	513.084	22.6926	0.2607	0.0222	-0.156918	0.01493	0.003157	72.5745	9.20478	0.688245	328.549	3.2187	7.656	206Pb* <80%
2011_08_22Aug\ 83002@10.ais	83002	10	1	R	675.676	29.6293	0.07386	0.00748	0.0932943	0.006183	0.002851	96.4673	9.28629	0.427277	214.226	2.61618	7.492
2011_08_22Aug\ 83002@11.ais	83002	11	1	R	564.653	25.6979	0.1807	0.00744	-0.00895767	0.01564	0.003386	82.8025	9.53106	0.540877	343.38	2.13705	7.394
2011_08_22Aug\ 83002@12.ais	83002	12	1	R	591.366	34.7266	0.127	0.00724	-0.0459364	0.01079	0.003722	89.673	9.84313	0.654553	216.492	1.5424	7.236
2011_08_22Aug\ 83002@13.ais	83002	13	1	R	592.768	29.4803	0.1551	0.0167	0.128329	0.03089	0.008201	86.0714	9.44822	0.585546	124.004	3.60857	7.339
2011_08_22Aug\ 83002@14.ais	83002	14	1	R	655.738	32.5504	0.08018	0.0055	-0.0339789	0.005597	0.001771	95.6579	9.49044	0.494095	504.668	3.31321	7.397
2011_08_22Aug\ 83002@15.ais	83002	15	1	R	225.124	11.4032	0.5758	0.00984	0.0588691	0.03642	0.004002	32.2975	9.33433	1.74566	243.888	3.15044	7.417	206Pb* <80%
2011_08_22Aug\ 83002@16.ais	83002	16	1	R	37.2856	2.11313	0.7917	0.007	0.029636	0.05124	0.002808	4.70255	8.2147	13.3077	198.942	2.64768	7.054	206Pb* <80%
2011_08_22Aug\ 83002@17.ais	83002	17	1	R	671.592	36.9398	0.07289	0.00869	-0.138676	0.003376	0.002052	96.5931	9.35503	0.54004	248.42	2.72644	7.371
2011_08_22Aug\ 83002@18.ais	83002	18	1	R	613.874	33.162	0.09366	0.00718	0.033475	0.005538	0.003054	93.9396	9.93579	0.576636	165.819	1.70124	7.257
2011_08_22Aug\ 83002@19.ais	83002	19	1	R	684.463	32.3726	0.05803	0.00391	-0.0536437	0.002662	0.001286	98.4901	9.35557	0.448298	487.571	2.27488	7.344
2011_08_22Aug\ 83002@20.ais	83002	20	1	R	664.894	28.6028	0.05009	0.00182	-0.0290056	0.002451	0.0006186	99.5048	9.68941	0.417822	1812.48	0.867684	7.516
2011_08_22Aug\ 83002@21.ais	83002	21	1	R	124.285	8.43398	0.6494	0.0105	-0.0753427	0.04784	0.002885	22.8802	11.9431	4.68628	488.601	2.30638	7.083	206Pb* <80%
2011_08_22Aug\ 83002@22.ais	83002	22	1	R	674.309	31.6466	0.07551	0.00458	-0.0970413	0.006552	0.002582	96.255	9.28058	0.453641	352.649	2.16987	7.461
2011_08_22Aug\ 83002@23.ais	83002	23	1	R	515.198	25.03	0.2359	0.0152	-0.19633	0.01594	0.003939	75.7487	9.5537	0.688972	252.952	1.96377	7.386	206Pb* <80%
2011_08_22Aug\ 83002@24.ais	83002	24	1	R	486.145	27.4151	0.2443	0.00685	0.0430733	0.01548	0.003352	74.6733	9.97653	0.7818	303.625	1.93752	7.251	206Pb* <80%
2011_08_22Aug\ 83002@25.ais	83002	25	1	R	679.81	29.6232	0.06375	0.00512	-0.357497	0.002304	0.001629	97.7588	9.32155	0.420215	259.955	1.01785	8.214
2011_08_22Aug\ 83002@26.ais	83002	26	1	R	401.606	16.6126	0.3332	0.00934	0.00412941	0.02028	0.003997	63.3052	10.2455	0.735526	241.005	3.05461	7.906	206Pb* <80%
2011_08_22Aug\ 83002@27.ais	83002	27	1	R	647.249	28.2779	0.09313	0.00856	-0.26889	0.005313	0.002931	94.0078	9.43813	0.452874	173.441	1.92046	8.157
2011_08_22Aug\ 83002@28.ais	83002	28	1	R	655.738	25.3695	0.06393	0.00661	0.0122524	0.004269	0.001835	97.7321	9.6777	0.388711	384.371	1.62116	7.99
2011_08_22Aug\ 83002@29.ais	83002	29	1	R	657.895	26.662	0.06813	0.00491	0.193829	0.004114	0.001789	97.1986	9.60788	0.400932	414.445	2.85509	7.911
2011_08_22Aug\ 83002@30.ais	83002	30	1	R	652.316	26.9777	0.06866	0.00631	-0.112794	0.00701	0.002709	97.1335	9.65623	0.417108	276.228	1.15976	8.148
2011_08_22Aug\ 83002@31.ais	83002	31	1	R	582.411	23.1336	0.1349	0.0101	-0.220735	0.008588	0.00304	88.6713	9.87821	0.470628	246.154	1.36782	7.988
2011_08_22Aug\ 83002@32.ais	83002	32	1	R	571.429	23.4449	0.1555	0.00617	0.0916277	0.008453	0.002443	86.0233	9.78751	0.475141	373.248	2.77501	8.041
	sample	grain	spot	Core/Rim	238U/206Pb	1σ 238U/206Pb	207Pb/206Pb	1σ 207Pb/206Pb	Correlation of TW Concordia Ellipses	204Pb/206Pb	1σ 204Pb/206 Pb	% 206Pb*	206Pb/238U age [Ma]	1σ 206Pb/238U age [Ma]	U (ppm)	U/Th	UO/U	Comments
Atana	Atana
2011_08_14Aug\ 88055_z@1.ais	88055	1	1	R	1517.68	37.084	0.09066	0.00761	-0.0279519	0.003316	0.002193	94.3065	4.08613	0.111419	418.589	1.89148	7.941
2011_08_14Aug\ 88055_z@2.ais	88055	2	1	R	1197.32	31.1085	0.08736	0.00654	0.308578	0.00539	0.002696	94.7305	5.19607	0.145422	363.789	4.57338	8.035
2011_08_14Aug\ 88055_z@3.ais	88055	3	1	R	1374.38	28.7117	0.05858	0.00391	0.272753	0.00146	0.0008433	98.4085	4.70409	0.100169	1155.42	2.71308	7.873
2011_08_14Aug\ 88055_z@4.ais	88055	4	1	R	1004.62	15.2399	0.05287	0.00145	-0.053011	0.0003341	0.000203	99.1441	6.45477	0.0981247	3412.03	3.98686	8.002
2011_08_14Aug\ 88055_z@5.ais	88055	5	1	R	1450.96	36.0003	0.09335	0.00746	0.55968	0.005979	0.002758	93.9607	4.2555	0.115581	429.142	1.93586	7.998
2011_08_14Aug\ 88055_z@6.ais	88055	6	1	C	1509.89	42.1757	0.1043	0.011	-0.436729	0.004174	0.002411	92.5556	4.04101	0.136035	454.505	2.80304	7.871
2011_08_14Aug\ 88055_z@7.ais	88055	7	1	C	1515.61	34.4561	0.08837	0.00519	-0.0849751	0.001489	0.001311	94.6006	4.11502	0.100984	551.331	3.14008	7.786
2011_08_14Aug\ 88055_z@8.ais	88055	8	1	R	1425.11	36.5569	0.1103	0.00787	0.178209	0.004217	0.002281	91.7974	4.24103	0.123517	477.277	2.70948	7.9
2011_08_14Aug\ 88055_z@9.ais	88055	9	1	R	1324.5	32.6301	0.09169	0.0122	-0.548684	0.004457	0.001311	94.1754	4.63865	0.14415	1506.25	0.991079	7.683
2011_08_14Aug\ 88055_z@10.ais	88055	12	1	R	1459.85	31.7545	0.08456	0.00647	-0.178045	0.003694	0.002134	95.0869	4.27509	0.103032	519.858	1.648	7.941
2011_08_14Aug\ 88055_z@11.ais	88055	13	1	R	1473.41	32.1297	0.07939	0.00551	-0.291736	0.0007783	0.0007783	95.7475	4.27236	0.100953	829.032	2.11697	7.989
2011_08_14Aug\ 88055_z@12.ais	88055	14	1	C	1610.05	52.6227	0.1642	0.0285	0.33462	0.02684	0.01099	84.9052	3.4884	0.184837	154.254	2.6867	8.142
2011_08_14Aug\ 88055_z@13.ais	88055	15	1	R	1449.07	39.2661	0.09771	0.00644	0.101629	0.002792	0.001975	93.4052	4.24402	0.125633	504.862	2.72508	7.867
2011_08_14Aug\ 88055_z@14.ais	88055	16	1	R	1552.55	33.7459	0.08305	0.00567	0.296686	0.002477	0.001637	95.2781	4.04704	0.0941374	649.452	3.06331	7.938
2011_08_14Aug\ 88055_z@15.ais	88055	17	1	R	1527.65	37.3395	0.08288	0.00697	0.107269	0.004892	0.002826	95.3012	4.09321	0.10905	415.442	1.4345	8
2011_08_14Aug\ 88055_z@16.ais	88055	18	1	R	1513.55	32.7588	0.06838	0.00472	0.302985	0.001964	0.001263	97.155	4.21764	0.0949473	799.226	1.8459	7.958
2011_08_14Aug\ 88055_z@17.ais	88055	19	1	R	1544.64	34.8343	0.07219	0.00468	-0.171189	n.d.	n.d.	96.6687	4.07863	0.0976629	744.796	0.816324	8.289
2011_08_14Aug\ 88055_z@18.ais	88055	20	1	R	1471.02	39.1666	0.1005	0.0085	-0.0749342	0.00591	0.002957	93.0425	4.15496	0.126069	483.942	1.71637	7.903
2011_08_14Aug\ 88055_z@19.ais	88055	21	1	R	1529.29	36.484	0.07603	0.00481	0.107721	0.0007872	0.0007874	96.1776	4.14484	0.103549	887.35	3.01893	7.857
2011_08_14Aug\ 88055_z@20.ais	88055	22	1	C	1479.73	34.3766	0.06819	0.00547	-0.221691	0.001671	0.001182	97.1791	4.3231	0.105984	787.933	2.84862	7.969
2011_08_14Aug\ 88055_z@21.ais	88055	23	1	C	1490.31	28.8734	0.06978	0.00331	0.119462	0.0009018	0.0006377	96.977	4.28172	0.0855895	1520.14	2.49359	7.925
2011_08_14Aug\ 88055_z@22.ais	88055	24	1	R	1499.7	38.2347	0.124	0.0118	0.150368	0.007356	0.00425	90.0437	3.95603	0.125139	282.515	2.31488	7.936
2011_08_14Aug\ 88055_z@23.ais	88055	25	1	R	1547.51	40.4718	0.09522	0.00865	0.386818	0.005427	0.0033	93.7211	3.99697	0.116078	344.906	3.43993	7.908
2011_08_14Aug\ 88055_z@24.ais	88055	26	1	R	1513.32	34.3519	0.07054	0.0055	-0.192977	0.004697	0.00235	96.8785	4.21857	0.101466	581.878	3.23483	7.834
2011_08_14Aug\ 88055_z@25.ais	88055	27	1	C	1564.46	48.7057	0.08637	0.00606	0.0640691	0.001369	0.001369	94.8542	3.99966	0.1321	505.232	3.0909	7.847
2011_08_14Aug\ 88055_z@26.ais	88055	28	1	R	195.542	3.90013	0.08207	0.0022	0.107942	0.0003424	0.0002422	95.4703	31.4888	0.661922	502.27	3.05732	7.953
2011_08_14Aug\ 88055_z@27.ais	88055	29	1	R	1442.38	43.2734	0.1033	0.00799	0.440065	0.005375	0.003106	92.6858	4.22135	0.139468	342.869	1.80033	8.038
2011_08_14Aug\ 88055_z@28.ais	88055	30	1	R	1548.71	36.9368	0.07047	0.00585	0.771683	0.003731	0.001669	96.8871	4.12626	0.102138	937.521	3.58626	7.914
2011_08_14Aug\ 88055_z@29.ais	88055	32	1	C	1402.52	48.39	0.1115	0.0169	-0.15508	0.004859	0.003556	91.6438	4.29978	0.186967	238.638	2.57275	7.89
2011_08_14Aug\ 88055_z@30.ais	88055	34	1	R	1504.21	38.6914	0.08361	0.0098	-0.0902633	0.003746	0.002277	95.2073	4.17171	0.122066	446.73	3.18445	7.952
2011_08_14Aug\ 88055_z@31.ais	88055	35	1	R	1456.45	45.8191	0.08419	0.0076	0.156602	0.005605	0.003239	95.1338	4.28691	0.144916	323.43	1.6456	8.005
2011_08_14Aug\ 88055_z@32.ais	88055	36	1	C	1266.78	50.8704	0.1643	0.0227	-0.54208	0.006273	0.003031	84.8834	4.40598	0.264526	349.719	2.44441	7.98
2011_08_14Aug\ 88055_z@33.ais	88055	37	1	R	1494.1	33.2617	0.06616	0.00405	-0.228972	0.001014	0.0008927	97.4379	4.29541	0.0989818	798.67	3.17006	7.936
2011_08_14Aug\ 88055_z@34.ais	88055	38	1	R	1489.2	37.9231	0.0683	0.00508	0.148764	0.003607	0.001951	97.1646	4.29375	0.113294	614.091	2.59194	7.971
2011_08_14Aug\ 88055_z@35.ais	88055	39	1	R	1567.89	36.3825	0.07494	0.00551	0.00461117	0.0009125	0.0009126	96.3159	4.05005	0.0994929	703.696	2.90019	8.091
2011_08_14Aug\ 88055_z@36.ais	88055	40	1	R	1490.09	34.6378	0.08642	0.00649	0.276301	0.001462	0.001287	94.8476	4.18504	0.105575	537.446	1.99223	8.042
2011_08_14Aug\ 88055_z@37.ais	88055	43	1	R	1495.22	26.1573	0.06289	0.00324	0.0576464	0.002519	0.001194	97.8573	4.30252	0.0773503	1181.9	2.14576	8.101
2011_08_14Aug\ 88055_z@38.ais	88055	44	1	C	1551.35	33.6936	0.07962	0.00565	0.0289811	0.004513	0.00211	95.7165	4.06792	0.0948035	689.256	2.99375	7.954
2011_08_14Aug\ 88055_z@39.ais	88055	45	1	C	1512.4	32.023	0.0873	0.00567	0.0377051	0.003377	0.00195	94.7353	4.12249	0.0950827	530.966	2.22492	8.114
2011_08_14Aug\ 88055_z@40.ais	88055	46	1	C	1508.75	40.7463	0.1011	0.0131	0.307797	0.001377	0.001635	92.9728	4.05098	0.132111	318.431	1.76914	7.841
2011_08_14Aug\ 88055_z@41.ais	88055	48	1	C	1470.59	38.9273	0.1016	0.00845	-0.240492	0.004782	0.002907	92.9127	4.13802	0.126392	366.011	1.21621	7.905
2011_08_14Aug\ 88055_z@42.ais	88055	49	1	C	1408.45	62.2892	0.1907	0.0236	0.511052	0.03323	0.01433	81.5266	3.80916	0.232379	97.8991	1.71277	7.99
2011_08_14Aug\ 88055_z@43.ais	88055	50	1	R	1497.68	48.8983	0.07873	0.00773	0.14982	0.006327	0.003656	95.8315	4.21299	0.146032	379.526	2.64112	7.64
2011_08_14Aug\ 88055_z@44.ais	88055	51	1	R	1526.02	30.0407	0.06488	0.0042	0.0758338	0.001511	0.001069	97.6022	4.21032	0.0859037	911.602	2.52957	7.926
2011_08_14Aug\ 88055_z@45.ais	88055	52	1	C	1506.25	39.9307	0.08334	0.00899	-0.11572	0.003062	0.002166	95.2417	4.15634	0.123448	410.073	1.87949	8.173
2011_08_14Aug\ 88055_z@46.ais	88055	53	1	C	1631.06	44.6937	0.08075	0.0138	0.253748	0.007083	0.003909	95.5726	3.86234	0.125406	339.537	2.2585	8.045
2011_08_14Aug\ 88055_z@47.ais	88055	54	1	R	1501.73	27.7388	0.08784	0.00726	0.0812594	0.005584	0.002794	94.6665	4.14291	0.0876886	449.877	1.81232	7.979
2011_08_14Aug\ 88055_z@48.ais	88055	55	1	C	1569.61	40.4044	0.08355	0.00669	0.155317	0.002665	0.002039	95.2137	3.98545	0.110661	411.184	1.57723	7.983
2011_08_14Aug\ 88055_z@49.ais	88055	56	1	R	1445.5	36.9839	0.09889	0.00822	0.143036	0.007311	0.003799	93.2536	4.24992	0.122222	281.59	3.12328	7.95
2011_08_14Aug\ 88055_z@50.ais	88055	57	1	R	1337.61	44.5513	0.1037	0.0115	-0.449155	0.002618	0.002617	92.639	4.54439	0.178814	210.498	1.86989	7.902
2011_08_14Aug\ 88055_z@51.ais	88055	58	1	C	1516.53	39.0977	0.06628	0.0043	0.0863359	0.002511	0.00145	97.4232	4.20752	0.111869	765.531	1.25099	7.797
2011_08_14Aug\ 88055_z@52.ais	88055	59	1	C	583.431	15.4878	0.5188	0.0115	-0.264827	0.03039	0.003005	39.5727	4.4358	0.419711	923.266	1.17255	7.813	206Pb* <80%
2011_08_14Aug\ 88055_z@53.ais	88055	60	1	R	1515.15	41.0927	0.07656	0.00897	0.228441	0.002428	0.001858	96.1088	4.18596	0.123627	424.699	4.7425	8.018
2011_08_14Aug\ 88055_z@54.ais	88055	61	1	R	1511.26	32.203	0.07069	0.00783	0.0941632	0.001018	0.001019	96.8585	4.2228	0.0992832	591.875	3.13048	7.88
	sample	grain	spot	Core/Rim	238U/206Pb	1σ 238U/206Pb	207Pb/206Pb	1σ 207Pb/206Pb	Correlation of TW Concordia Ellipses	204Pb/206Pb	1σ 204Pb/206 Pb	% 206Pb*	206Pb/238U age [Ma]	1σ 206Pb/238U age [Ma]	U (ppm)	U/Th	UO/U	Comments
Cerro Bola	Bola
2010_06_11June\ Bolla_int_Z@1.ais	Bola	1	1	C	2068.68	64.1916	0.07938	0.00541	-0.0676155	0.01367	0.003308	95.7471	3.06854	0.0993208	942.312	2.20279	8.542
2010_06_11June\ Bolla_int_Z@11.ais	Bola	11	1	C	2420.14	89.0273	0.08451	0.00616	0.0252146	0.01118	0.003421	95.0903	2.62299	0.100333	860.538	2.80121	8.579
2010_06_11June\ Bolla_int_Z@12.ais	Bola	12	1	C	2197.32	65.6637	0.07215	0.00399	-0.198147	0.004008	0.001418	96.6703	2.92483	0.0893941	1714.86	2.62672	8.467
2010_06_11June\ Bolla_int_Z@13.ais	Bola	13	1	C	1959.63	73.731	0.1399	0.0164	0.11217	0.00954	0.004958	88.0072	2.97833	0.140026	285.013	2.05641	8.663
2010_06_11June\ Bolla_int_Z@14.ais	Bola	14	1	C	2648.31	84.1622	0.07428	0.00613	-0.143503	0.003057	0.001486	96.3968	2.43329	0.0799334	1655.32	2.3726	8.57
2010_06_11June\ Bolla_int_Z@15.ais	Bola	15	1	C	2418.38	77.7859	0.07418	0.00602	0.129645	0.01035	0.003028	96.41	2.65509	0.0879331	1037.24	2.21567	8.628
2010_06_11June\ Bolla_int_Z@16.ais	Bola	16	1	C	2401.54	68.6318	0.08605	0.00698	0.10244	0.001956	0.001383	94.8928	2.64067	0.0800528	921.032	3.42305	8.569
2010_06_11June\ Bolla_int_Z@2.ais	Bola	2	1	C	2480.77	88.0056	0.06774	0.00446	0.277721	0.006687	0.002148	97.2326	2.61486	0.093141	1352.14	2.5424	8.415
2010_06_11June\ Bolla_int_Z@3.ais	Bola	3	1	C	2453.39	78.8502	0.07774	0.00539	-0.0979298	0.007783	0.0025	95.9542	2.61675	0.0866528	1114.71	3.9477	8.569
2010_06_11June\ Bolla_int_Z@4.ais	Bola	4	1	C	2098.2	65.1559	0.07382	0.00444	-0.0647242	0.00581	0.002019	96.4544	3.05074	0.0972381	1100.84	2.45575	8.539
2010_06_11June\ Bolla_int_Z@5.ais	Bola	5	1	C	2575.99	91.5731	0.06428	0.0039	-0.0564997	0.006563	0.001896	97.6738	2.52729	0.0900245	1759.09	2.02245	8.356
2010_06_11June\ Bolla_int_Z@6.ais	Bola	6	1	C	2632.27	133.727	0.07825	0.00738	-0.301008	0.0059	0.002035	95.8905	2.42939	0.12764	1820.54	1.87606	8.596
2010_06_11June\ Bolla_int_Z@7.ais	Bola	7	1	C	2017.35	62.2664	0.07255	0.00592	-0.0652948	0.004967	0.002223	96.6183	3.17609	0.101663	715.88	2.63141	8.605
2010_06_11June\ Bolla_int_Z@8.ais	Bola	8	1	C	2127.66	74.6944	0.09218	0.00638	0.106137	0.003998	0.002	94.1081	2.94563	0.10913	810.326	3.66078	8.39
2010_06_11June\ Bolla_int_Z@9.ais	Bola	9	1	C	1997.2	78.5798	0.1433	0.0217	-0.235677	0.009699	0.004475	87.5715	2.91288	0.157064	356.027	2.33864	8.526
	sample	grain	spot	Core/Rim	238U/206Pb	1σ 238U/206Pb	207Pb/206Pb	1σ 207Pb/206Pb	Correlation of TW Concordia Ellipses	204Pb/206Pb	1σ 204Pb/206 Pb	% 206Pb*	206Pb/238U age [Ma]	1σ 206Pb/238U age [Ma]	U (ppm)	U/Th	UO/U	Comments
Chuhuilla	Chuhuilla
2011_08-18Aug\ 06050@1.ais	BOL06050	1	1	C	1000	36	0.05228	0.00214	-0.0538318	0.0002009	0.0002009	99.217	6.46684	0.232976	2029.07	1.48268	7.72
2011_08-18Aug\ 06050@2.ais	BOL06051	1	2	R	996.016	36.805	0.05478	0.00259	0.0567252	0.0005866	0.0003387	98.8982	6.473	0.240176	2014.26	1.53563	7.706
2011_08-18Aug\ 06050@10.ais	BOL06052	2	1	C	844.595	36.8083	0.05635	0.0026	-0.081157	0.001328	0.0007669	98.7041	7.59136	0.33408	833.105	1.10529	7.374
2011_08-18Aug\ 06050@11.ais	BOL06053	2	2	R	1042.43	44.3355	0.06153	0.00381	0.214757	0.001448	0.0009568	98.0345	6.16017	0.264433	660.375	6.05727	7.579
2011_08-18Aug\ 06050@17.ais	BOL06054	3	1	C	896.057	37.8175	0.05958	0.00296	0.0170947	0.0008375	0.0005922	98.2875	7.14867	0.305089	906.419	1.88563	7.404
2011_08-18Aug\ 06050@18.ais	BOL06055	3	2	R	1009.08	41.9517	0.06409	0.00349	0.0779977	0.00081	0.0006197	97.7084	6.3371	0.26723	943.075	4.73604	7.481
2011_08-18Aug\ 06050@24.ais	BOL06056	4	1	C	1049.98	38.6962	0.0717	0.00428	0.0580787	0.002067	0.000759	96.7339	6.02122	0.22887	1461.45	2.14652	7.753
2011_08-18Aug\ 06050@25.ais	BOL06057	4	2	R	1072.5	42.4445	0.05906	0.00273	-0.0496345	0.0006175	0.0004725	98.3512	6.0066	0.239172	1266.32	4.58751	7.531
2011_08-18Aug\ 06050@30.ais	BOL06058	5	1	C	1061.68	39.0002	0.05258	0.00249	0.0548995	0.0005059	0.0003869	99.1798	6.11461	0.223923	1357.22	3.77643	7.736
2011_08-18Aug\ 06050@31.ais	BOL06059	5	2	R	1131.09	44.2663	0.0609	0.00241	-0.0917912	0.001506	0.0007037	98.1142	5.68651	0.22425	1397.03	4.34212	7.601
2011_08-18Aug\ 06050@33.ais	BOL06060	6	1	C	1055.85	38.9075	0.05335	0.00372	-0.142183	0.001524	0.0008142	99.0807	6.12917	0.227187	1426.65	1.96958	7.736
2011_08-18Aug\ 06050@34.ais	BOL06061	6	2	R	1133.14	44.2986	0.05417	0.00269	0.00389114	0.0006133	0.0004337	98.9754	5.72259	0.223421	1457.56	3.52717	7.68
2011_08-18Aug\ 06050@37.ais	BOL06062	7	1	C	895.255	29.735	0.05125	0.0011	-0.0134767	0.0003489	0.000156	99.3505	7.24356	0.239556	4922.73	3.36573	7.916
2011_08-18Aug\ 06050@38.ais	BOL06063	7	2	R	1001.5	41.023	0.05809	0.00227	-0.0937182	9.029e-05	0.0001676	98.4759	6.43026	0.264832	1242.62	3.61628	7.504
2011_08-18Aug\ 06050@41.ais	BOL06064	8	1	C	1043.84	43.9111	0.06533	0.0051	0.0349782	0.0007105	0.0007101	97.5495	6.12221	0.262937	615.572	6.18126	7.4
2011_08-18Aug\ 06050@42.ais	BOL06065	8	2	R	1099.38	44.3573	0.05826	0.00355	-0.106116	0.000686	0.0006863	98.4522	5.86975	0.23852	632.975	5.37664	7.588
2011_08-18Aug\ 06050@43.ais	BOL06066	9	1	C	1010.61	42.1812	0.1241	0.00577	-0.139413	0.008018	0.001483	90.0263	5.83499	0.274094	1560.68	3.68732	7.463
2011_08-18Aug\ 06050@44.ais	BOL06067	9	2	R	841.751	33.3724	0.2505	0.00697	-0.0340121	0.01213	0.001742	73.8676	5.75289	0.324579	1451.45	4.82516	7.484	206Pb* <80%
2012_03_15Mar\ SDS5_Chu@1.ais	SDS5	1	1	R	331.785	15.9618	0.5418	0.00809	-0.00388832	0.03226	0.003572	36.6485	7.20928	1.13122	906.85	3.14837	8.23	206Pb* <80%
2012_03_15Mar\ SDS5_Chu@10.ais	SDS5	10	1	R	1320.13	50.3654	0.05876	0.00642	-0.172835	n.d.	n.d.	98.3864	4.88949	0.190898	779.982	2.33926	9.039
2012_03_15Mar\ SDS5_Chu@11.ais	SDS5	11	1	R	1095.29	46.4269	0.05853	0.00386	0.0177985	0.00153	0.001082	98.419	5.88579	0.251297	1039.74	3.92555	8.631
2012_03_15Mar\ SDS5_Chu@12.ais	SDS5	12	1	R	891.266	41.3859	0.1665	0.0136	0.0165307	0.005492	0.002568	84.6124	6.20414	0.361275	523.118	2.36348	8.632
2012_03_15Mar\ SDS5_Chu@13.ais	SDS5	13	1	R	443.656	40.3502	0.4431	0.0311	-0.316866	0.0311	0.003241	49.2539	7.24172	1.77194	1218.6	2.58475	8.291	206Pb* <80%
2012_03_15Mar\ SDS5_CHU@14CORE.ais	SDS5	14	1	C	928.505	46.2959	0.04753	0.00365	0.0793551	0.001486	0.001084	99.8298	6.99159	0.347513	1020.24	1.16027	8.341
2012_03_15Mar\ SDS5_CHU@15.ais	SDS5	15	1	R	978.474	44.9026	0.05528	0.0035	0.0577531	0.001172	0.0008964	98.8377	6.59419	0.303805	1231.12	2.23138	8.38
2012_03_15Mar\ SDS5_CHU@16.ais	SDS5	16	1	R	1101.2	65.6039	0.07726	0.0107	0.100772	0.006853	0.00396	96.0235	5.68638	0.357046	361.344	1.25164	8.479
2012_03_15Mar\ SDS5_CHU@17.ais	SDS5	17	1	R	1087.9	46.9862	0.05188	0.003	-0.0708654	0.0009092	0.0006431	99.2687	5.9708	0.257207	1869.55	2.91389	8.482
2012_03_15Mar\ SDS5_CHU@18.ais	SDS5	18	1	R	984.252	38.7501	0.05659	0.00376	0.0966119	0.0005352	0.0005352	98.6708	6.56232	0.259626	1377.01	8.61618	8.607
2012_03_15Mar\ SDS5_CHU@19.ais	SDS5	19	1	R	1140.51	48.7787	0.05158	0.00358	0.0542536	0.0005985	0.0005984	99.3068	5.70668	0.243099	1446.58	3.9894	8.587
2012_03_15Mar\ SDS5_Chu@2.ais	SDS5	2	1	R	933.707	50.5649	0.06608	0.012	-0.10483	0.001934	0.001935	97.4558	6.81943	0.388529	462.212	3.55568	8.378
2012_03_15Mar\ SDS5_CHU@20.ais	SDS5	20	1	R	942.507	40.3297	0.05134	0.0022	-0.0322787	n.d.	n.d.	99.341	6.88053	0.293527	2616.79	2.6552	8.414
2012_03_15Mar\ SDS5_CHU@21.ais	SDS5	21	1	R	969.932	47.9792	0.06315	0.00782	0.297811	n.d.	n.d.	97.8272	6.58265	0.333762	588.838	2.07616	8.493
2012_03_15Mar\ SDS5_CHU@22.ais	SDS5	22	1	R	1156.2	46.2535	0.05261	0.00366	0.00328977	0.000735	0.0007353	99.1741	5.61915	0.224623	979.552	3.04709	8.796
2012_03_15Mar\ SDS5_CHU@23.ais	SDS5	23	1	R	1041.78	46.2336	0.04764	0.00325	0.231775	0.0005682	0.0005682	99.8105	6.26579	0.27547	1339.69	3.14066	8.522
2012_03_15Mar\ SDS5_CHU@24.ais	SDS5	24	1	R	1032.42	47.3254	0.05047	0.00417	-0.0271642	0.001067	0.001068	99.4488	6.30418	0.288234	723.169	4.5156	8.491
2012_03_15Mar\ SDS5_CHU@25.ais	SDS5	25	1	R	1052.63	45.3186	0.06759	0.0031	0.00682777	0.003348	0.001266	97.2603	6.05016	0.265238	1692.61	4.15343	8.437
2012_03_15Mar\ SDS5_CHU@26.ais	SDS5	26	1	R	1175.23	45.7163	0.05361	0.00445	0.0724928	0.000463	0.0005495	99.0457	5.5272	0.215469	1295.16	4.14462	8.607
2012_03_15Mar\ SDS5_CHU@27.ais	SDS5	27	1	R	1228.8	51.0366	0.05544	0.00443	0.0397534	0.001536	0.001086	98.8113	5.24059	0.219877	1122.07	1.03511	8.621
2012_03_15Mar\ SDS5_Chu@3.ais	SDS5	3	1	R	871.84	44.6181	0.09215	0.00445	0.094484	0.00323	0.001476	94.1169	7.04935	0.381647	1438.63	3.4577	8.209
2012_03_15Mar\ SDS5_Chu@4.ais	SDS5	4	1	R	1085.66	50.6821	0.05337	0.0039	0.0513421	0.0008323	0.0008321	99.078	5.97489	0.278779	1149.51	3.56448	8.419
2012_03_15Mar\ SDS5_Chu@5.ais	SDS5	5	1	R	1104.24	45.2378	0.04838	0.00336	-0.036577	0.0006426	0.0006427	99.7157	5.91024	0.24057	1311.77	2.96563	8.561
2012_03_15Mar\ SDS5_Chu@6.ais	SDS5	6	1	R	1136.88	46.7884	0.05707	0.003	-0.0457332	0.002652	0.001058	98.6046	5.68033	0.234685	1990.88	2.96893	8.582
2012_03_15Mar\ SDS5_Chu@7.ais	SDS5	7	1	R	1165.64	43.0711	0.0584	0.00793	-0.0787485	0.00102	0.00102	98.4337	5.54034	0.21164	713.299	5.07922	8.949
2012_03_15Mar\ SDS5_Chu@8.ais	SDS5	8	1	R	1082.25	44.6253	0.05642	0.00339	0.0112746	n.d.	n.d.	98.6879	5.96983	0.247108	1318.27	3.47972	8.48
2012_03_15Mar\ SDS5_Chu@9.ais	SDS5	9	1	R	1033.91	41.2624	0.05905	0.00557	0.0633715	0.001148	0.001148	98.3521	6.2178	0.252466	610.264	2.5198	8.724
	sample	grain	spot	Core/Rim	238U/206Pb	1σ 238U/206Pb	207Pb/206Pb	1σ 207Pb/206Pb	Correlation of TW Concordia Ellipses	204Pb/206Pb	1σ 204Pb/206 Pb	% 206Pb*	206Pb/238U age [Ma]	1σ 206Pb/238U age [Ma]	U (ppm)	U/Th	UO/U	Comments
Guacha	Guacha
2011_08_15Aug\ ARIBOL 10007@1.ais	ARIBOL 10007	1	1	R	1117.69	29.3571	0.07827	0.00683	0.112514	0.001591	0.001591	95.894	5.60883	0.158695	251.598	1.80956	8.065
2011_08_15Aug\ ARIBOL 10007@2.ais	ARIBOL 10007	2	1	C	1075.96	21.0701	0.07033	0.00539	0.0557609	0.00426	0.002213	96.9098	5.89518	0.123643	333.242	2.97441	7.983
2011_08_15Aug\ ARIBOL 10007@3.ais	ARIBOL 10007	2	2	R	1043.95	31.4962	0.09322	0.00866	0.132249	0.003123	0.002389	93.9847	5.89403	0.196972	222.161	3.2381	7.979
2011_08_15Aug\ ARIBOL 10007@4.ais	ARIBOL 10007	3	1	C	1044.06	28.1235	0.07019	0.00565	-0.0606721	0.0003778	0.0007017	96.9271	6.06609	0.172132	318.246	2.08777	7.819
2011_08_15Aug\ ARIBOL 10007@6.ais	ARIBOL 10007	4	1	R	1091.46	20.252	0.0924	0.00359	0.00753505	0.003018	0.001204	94.0895	5.63736	0.113036	844.028	1.96197	8.049
2011_08_15Aug\ ARIBOL 10007@7.ais	ARIBOL 10007	6	1	C	956.938	21.7028	0.08925	0.00756	0.101338	0.001901	0.001901	94.4912	6.44436	0.164603	243.267	1.92326	7.789
2011_08_15Aug\ ARIBOL 10007@8.ais	ARIBOL 10007	7	1	R	1153.93	27.5634	0.07456	0.00654	-0.103467	0.004394	0.002751	96.3664	5.46647	0.141264	331.206	2.17607	8.138
2011_08_15Aug\ ARIBOL 10007@9.ais	ARIBOL 10007	8	1	C	1090.99	28.9232	0.06153	0.00471	-0.0254619	0.003056	0.001765	98.0346	5.87696	0.160513	547.813	2.33937	7.89
2011_08_15Aug\ ARIBOL 10007@10.ais	ARIBOL 10007	9	1	R	1066.21	26.8287	0.07169	0.00553	0.14274	0.003088	0.001783	96.7363	5.93001	0.157232	549.294	2.05995	7.743
2011_08_15Aug\ ARIBOL 10007@11.ais	ARIBOL 10007	10	1	R	1100.11	26.9884	0.07097	0.00948	-0.0871267	0.005815	0.00291	96.8271	5.75715	0.159309	354.718	2.22687	8.149
2011_08_15Aug\ ARIBOL 10007@12.ais	ARIBOL 10007	11	1	R	1105.71	32.8875	0.05656	0.00413	0.295939	0.000599	0.000711	98.6697	5.83017	0.175442	684.442	1.79384	7.86
2011_08_15Aug\ ARIBOL 10007@13.ais	ARIBOL 10007	12	1	R	1006.44	26.0321	0.07469	0.00613	0.169047	0.0003694	0.0006853	96.3549	6.26025	0.172	408.036	2.95384	7.79
2011_08_15Aug\ ARIBOL 10007@14.ais	ARIBOL 10007	13	1	R	1119.57	39.1072	0.1025	0.0175	0.217582	0.009087	0.005253	92.7987	5.42637	0.233165	200.686	2.18091	7.869
2011_08_15Aug\ ARIBOL 10007@15.ais	ARIBOL 10007	14	1	C	1048.11	35.4825	0.07403	0.00811	-0.0773161	n.d.	n.d.	96.4363	6.0204	0.217614	265.483	3.00102	8.105
2011_08_15Aug\ ARIBOL 10007@16.ais	ARIBOL 10007	15	1	R	1104	31.0796	0.08144	0.00876	-0.310664	0.009284	0.004156	95.4895	5.6649	0.178117	314.544	2.95384	8.028
2011_08_15Aug\ ARIBOL 10007@17.ais	ARIBOL 10007	16	1	R	1068.83	22.0484	0.06525	0.00706	0.021456	n.d.	n.d.	97.5583	5.97458	0.134654	414.146	3.28044	8.044
2011_08_15Aug\ ARIBOL 10007@18.ais	ARIBOL 10007	17	1	R	1005.43	20.6221	0.05415	0.0037	0.0154847	0.003997	0.001633	98.9792	6.43241	0.134655	797.189	2.63451	7.871
2011_08_15Aug\ ARIBOL 10007@19.ais	ARIBOL 10007	18	1	R	1042.75	33.3811	0.05422	0.00576	0.454513	0.005118	0.002824	98.9701	6.20691	0.201494	440.065	2.92965	7.699
2011_08_15Aug\ ARIBOL 10007@20.ais	ARIBOL 10007	19	1	R	1031.03	24.8749	0.07066	0.00584	0.292373	0.005032	0.002517	96.8681	6.14259	0.156394	425.809	2.56798	7.888
2011_08_15Aug\ ARIBOL 10007@21.ais	ARIBOL 10007	20	1	C	1005.03	27.5751	0.08048	0.00738	0.199846	0.003666	0.002594	95.6134	6.21658	0.184464	288.81	2.31638	7.891
2011_08_15Aug\ ARIBOL 10007@22.ais	ARIBOL 10007	21	1	R	1288.99	67.7892	0.08261	0.00844	0.00598898	0.002286	0.002287	95.3375	4.85381	0.268845	227.715	2.41557	8.709
2011_08_15Aug\ ARIBOL 10007@23.ais	ARIBOL 10007	22	1	C	1258.18	185.212	0.06061	0.00494	0.122436	0.0003058	0.0005674	98.1503	5.11719	0.755556	589.098	2.76273	8.43
2011_08_15Aug\ ARIBOL 10007@24.ais	ARIBOL 10007	23	1	R	1223.54	32.3363	0.09201	0.0102	0.132415	0.009015	0.005211	94.1339	5.04306	0.153102	191.799	2.18817	8.448
2011_08_15Aug\ ARIBOL 10007@25.ais	ARIBOL 10007	24	1	C	1038.1	40.7351	0.1176	0.0215	-0.0727903	0.00393	0.003932	90.8649	5.73031	0.294906	145.275	2.74942	7.855
2011_08_15Aug\ ARIBOL 10007@26.ais	ARIBOL 10007	25	1	C	887.311	19.4468	0.0548	0.00354	0.230864	0.00206	0.00103	98.901	7.28564	0.161869	891.423	11.0473	8.001
2011_08_15Aug\ ARIBOL 10007@27.ais	ARIBOL 10007	26	1	R	1120.32	24.9769	0.05613	0.00818	0.456601	0.0008725	0.0008725	98.7256	5.76512	0.138786	666.484	2.33695	8.102
2011_08_15Aug\ ARIBOL 10007@28.ais	ARIBOL 10007	27	1	C	1051.41	33.8274	0.09054	0.0112	-0.324446	0.00466	0.003081	94.3285	5.8734	0.217455	275.11	3.13528	7.938
2011_08_15Aug\ ARIBOL 10007@29.ais	ARIBOL 10007	27	2	R	1090.99	31.7798	0.07193	0.00503	0.00519348	0.004344	0.002098	96.7041	5.80645	0.176223	564.105	3.66751	8.104
2011_08_15Aug\ ARIBOL 10007@30.ais	ARIBOL 10007	28	1	R	997.009	25.1489	0.06799	0.00634	0.274959	n.d.	n.d.	97.2065	6.37061	0.169659	323.06	2.52686	7.756
2011_08_15Aug\ ARIBOL 10007@31.ais	ARIBOL 10007	29	1	C	1005.33	18.5966	0.06042	0.00505	-0.0630108	0.0002158	0.0004004	98.178	6.3724	0.125159	714.804	1.78779	7.953
2011_08_15Aug\ ARIBOL 10007@32.ais	ARIBOL 10007	30	1	C	1057.53	25.387	0.08814	0.00746	0.226096	0.001207	0.001207	94.6338	5.84792	0.155554	502.27	1.90754	8.064
2011_08_15Aug\ ARIBOL 10007@33.ais	ARIBOL 10007	31	1	C	962.464	18.0636	0.05983	0.00485	0.281875	0.002352	0.001554	98.2537	6.67513	0.131035	580.212	4.53237	8.099
2011_08_15Aug\ ARIBOL 10007@34.ais	ARIBOL 10007	32	1	C	1009.29	28.1149	0.06481	0.00553	0.670563	0.0009866	0.0009868	97.6159	6.32274	0.181297	586.506	2.85708	7.899
2011_08_15Aug\ ARIBOL 10007@35.ais	ARIBOL 10007	32	2	R	1084.72	30.2389	0.07339	0.00701	0.47623	0.002531	0.00179	96.5176	5.82329	0.171591	495.235	2.69741	7.87
2011_08_15Aug\ ARIBOL 10007@36.ais	ARIBOL 10007	33	1	R	1043.41	26.673	0.06428	0.0104	0.633115	n.d.	n.d.	97.6836	6.12219	0.172863	414.886	2.70225	7.952
2011_08_15Aug\ ARIBOL 10007@37.ais	ARIBOL 10007	34	1	C	995.025	33.9596	0.08239	0.00756	-0.277466	0.003677	0.002814	95.3745	6.26488	0.231569	318.246	2.56677	7.848
2011_08_15Aug\ ARIBOL 10007@38.ais	ARIBOL 10007	35	1	C	12.0034	0.306892	0.0619	0.00178	0.681052	8.203e-05	4.101e-05	99.4369	513.135	12.7	300.844	2.06358	8.025
2012_3_18Mar\ SDS10_011@1.ais	SDS10	1	1	R	1093.73	44.7398	0.0555	0.00362	0.142393	0.0004622	0.0005486	98.805	5.90377	0.242457	1237.38	1.98039	8.618
2012_3_18Mar\ SDS10_011@10.ais	SDS10	10	1	R	1208.61	53.3165	0.07438	0.0136	0.0881602	n.d.	n.d.	96.3893	5.22994	0.250834	296.104	2.83794	8.657
2012_3_18Mar\ SDS10_011@11.ais	SDS10	11	1	R	1167.95	44.1972	0.05263	0.00336	0.0287187	0.002284	0.001142	99.1706	5.55109	0.210232	1502.91	1.77013	8.567
2012_3_18Mar\ SDS10_011@12.ais	SDS10	12	1	R	1152.07	57.8691	0.06975	0.00935	0.15617	n.d.	n.d.	96.9822	5.51025	0.287878	302.604	2.23798	8.675
2012_3_18Mar\ SDS10_011@13.ais	SDS10	13	1	R	1109.14	44.2868	0.06085	0.00765	-0.00658359	n.d.	n.d.	98.1216	5.77749	0.23854	763.371	1.62262	8.712
2012_3_18Mar\ SDS10_011@14.ais	SDS10	14	1	R	1115.7	42.3226	0.04852	0.00312	0.0806464	0.000483	0.0004252	99.6979	5.84696	0.220286	2186.36	2.59245	8.886
2012_3_18Mar\ SDS10_011@15.ais	SDS10	15	1	R	1115.7	62.1146	0.07	0.00885	0.277632	n.d.	n.d.	96.9518	5.68703	0.326839	252.531	2.42182	8.721
2012_3_18Mar\ SDS10_011@16.ais	SDS10	16	1	R	1136.88	55.0604	0.07253	0.00612	-0.105923	0.003016	0.001833	96.6277	5.56459	0.279051	701.503	2.44604	8.697
2012_3_18Mar\ SDS10_011@17.ais	SDS10	17	1	R	1110	43.7396	0.07201	0.00593	-0.0995729	0.002473	0.00114	96.6949	5.69891	0.233614	1488.23	2.22147	8.878
2012_3_18Mar\ SDS10_011@18.ais	SDS10	18	1	R	1115.7	46.9283	0.06404	0.00494	0.0591624	n.d.	n.d.	97.7133	5.73005	0.245737	677.429	2.32055	8.83
2012_3_18Mar\ SDS10_011@19.ais	SDS10	19	1	R	1077.59	49.0023	0.1079	0.0144	0.0153671	0.003135	0.003137	92.1113	5.5974	0.292532	248.68	2.63648	8.729
2012_3_18Mar\ SDS10_011@2.ais	SDS10	2	1	R	1098.66	47.5579	0.06456	0.00867	0.254184	n.d.	n.d.	97.647	5.81464	0.260494	672.614	2.42843	8.864
2012_3_18Mar\ SDS10_011@20.ais	SDS10	20	1	R	1015.85	40.3491	0.1228	0.0128	-0.127669	0.01103	0.005113	90.1983	5.80885	0.274514	654.559	2.40861	8.771
2012_3_18Mar\ SDS10_011@3.ais	SDS10	3	1	R	1046.9	46.4705	0.08237	0.011	0.268891	0.001313	0.001313	95.3685	5.95749	0.283969	575.117	2.43063	8.773
2012_3_18Mar\ SDS10_011@4.ais	SDS10	4	1	R	1137.4	47.9953	0.05104	0.00353	-0.0397332	0.001408	0.0009958	99.3755	5.71873	0.240676	1166.36	2.56933	8.723
2012_3_18Mar\ SDS10_011@5.ais	SDS10	5	1	R	1118.44	56.1661	0.07302	0.00671	0.138365	0.002838	0.002007	96.5646	5.65026	0.293321	586.913	2.34146	8.795
2012_3_18Mar\ SDS10_011@6.ais	SDS10	6	1	R	1167.54	58.343	0.09027	0.00939	0.146463	0.004002	0.00283	94.3589	5.29612	0.283116	404.194	2.49998	8.728
2012_3_18Mar\ SDS10_011@7.ais	SDS10	7	1	R	1173.71	50.5576	0.06469	0.01	0.217332	n.d.	n.d.	97.6298	5.44834	0.245013	472.082	2.50879	8.628
2012_3_18Mar\ SDS10_011@8.ais	SDS10	8	1	R	1116.94	43.6647	0.05352	0.004	-0.0201131	0.0003701	0.0004392	99.0581	5.80401	0.227621	1549.37	2.63979	8.682
2012_3_18Mar\ SDS10_011@9.ais	SDS10	9	1	R	1124.35	55.1178	0.0761	0.0104	0.136503	0.008909	0.00515	96.1711	5.60086	0.289978	247.235	2.62217	8.659
	sample	grain	spot	Core/Rim	238U/206Pb	1σ 238U/206Pb	207Pb/206Pb	1σ 207Pb/206Pb	Correlation of TW Concordia Ellipses	204Pb/206Pb	1σ 204Pb/206 Pb	% 206Pb*	206Pb/238U age [Ma]	1σ 206Pb/238U age [Ma]	U (ppm)	U/Th	UO/U	Comments
Laguna Colorada	Laguna Colorada
2011_08_19Aug\ BOL07024LC@1.ais	BOL07024LC	1	1	R	2789.4	131.495	0.1402	0.0192	0.160027	0.01442	0.009547	87.9735	2.12258	0.121187	193.836	2.68361	7.464
2011_08_19Aug\ BOL07024LC@2.ais	BOL07024LC	6	1	R	2478.31	117.313	0.0824	0.0122	0.370991	0.001658	0.001658	95.359	2.57326	0.128062	567.067	3.28202	7.46
2011_08_19Aug\ BOL07024LC@3.ais	BOL07024LC	7	1	R	2221.73	112.543	0.125	0.0139	-0.142143	n.d.	n.d.	89.9094	2.70184	0.157452	201.982	3.34397	7.588
2011_08_19Aug\ BOL07024LC@4.ais	BOL07024LC	8	1	R	2468.53	106.029	0.1011	0.00868	0.0838702	n.d.	n.d.	92.9675	2.52166	0.115853	375.083	3.50346	7.397
2011_08_19Aug\ BOL07024LC@6.ais	BOL07024LC	12	1	R	3116.24	123.329	0.0785	0.0106	0.12377	0.003802	0.00291	95.8566	2.07957	0.085999	562.809	4.24817	7.475
2011_08_19Aug\ BOL07024LC@5.ais	BOL07024LC	12	2	C	2094.24	114.032	0.1196	0.016	0.323738	0.004989	0.004993	90.6017	2.87811	0.17654	168.435	2.69152	7.51
2011_08_19Aug\ BOL07024LC@7.ais	BOL07024LC	15	1	R	2086.81	94.0633	0.284	0.0128	0.0332464	0.02038	0.006329	69.5739	2.24411	0.15364	434.14	3.73412	7.381	206Pb* <80%
2011_08_19Aug\ BOL07024LC@8.ais	BOL07024LC	16	1	R	2608.24	104.085	0.1097	0.0156	-0.0970324	0.001835	0.001835	91.8607	2.36503	0.110225	548.924	3.6814	7.45
2011_08_19Aug\ BOL07024LC@9.ais	BOL07024LC	19	1	C	2840.91	149.309	0.1269	0.0152	-0.0769576	0.005192	0.003974	89.6708	2.1256	0.128063	363.234	2.8866	7.448
2011_08_19Aug\ BOL07024LC@10.ais	BOL07024LC	21	1	C	2698.33	140.523	0.1542	0.018	-0.144021	n.d.	n.d.	86.1692	2.14766	0.138088	327.318	2.62562	7.279
2011_08_19Aug\ BOL07024LC@11.ais	BOL07024LC	26	1	C	2632.96	115.773	0.1038	0.0125	0.156795	0.006108	0.003931	92.6188	2.34752	0.113819	370.269	1.79918	7.639
2011_08_19Aug\ BOL07024LC@12.ais	BOL07024LC	26	2	R	2211.41	1286.16	0.1221	0.0198	-0.070208	0.004489	0.004492	90.283	2.72586	1.71801	364.345	3.56673	6.674
2011_08_19Aug\ BOL07024LC@13.ais	BOL07024LC	28	1	R	2534.85	120.157	0.1136	0.0193	0.16272	0.003045	0.003047	91.3672	2.41622	0.133869	301.214	3.2293	7.593
2011_08_19Aug\ BOL07024LC@14.ais	BOL07024LC	30	1	R	2443.79	118.845	0.1091	0.012	0.346684	n.d.	n.d.	91.9527	2.5176	0.1331	409.703	3.11199	7.459
2011_08_19Aug\ BOL07024LC@15.ais	BOL07024LC	32	1	C	2376.99	107.917	0.09133	0.00816	0.199633	0.003021	0.002312	94.2162	2.64484	0.125985	536.52	2.74029	7.494
2011_08_19Aug\ BOL07024LC@16.ais	BOL07024LC	33	1	R	2568.71	122.068	0.09827	0.00909	0.225604	0.006352	0.003752	93.3311	2.43654	0.122314	447.1	3.60231	7.508
2011_08_19Aug\ BOL07024LC@17.ais	BOL07024LC	38	1	R	1296.18	48.8901	0.06906	0.00791	0.0497068	n.d.	n.d.	97.0696	4.91993	0.193716	418.219	3.45073	7.458
2011_08_19Aug\ BOL07024LC@18.ais	BOL07024LC	42	1	C	2598.08	122.85	0.111	0.0159	-0.0269863	0.002757	0.003273	91.701	2.37093	0.127566	256.226	3.95556	7.5
2011_08_19Aug\ BOL07024LC@19.ais	BOL07024LC	43	1	C	2567.39	106.123	0.1258	0.0165	-0.196502	0.008358	0.004183	89.8047	2.34196	0.117638	477.832	2.39495	7.532
2011_08_19Aug\ BOL07024LC@20.ais	BOL07024LC	44	1	R	2304.68	98.2635	0.1034	0.0105	0.123227	0.002527	0.002529	92.6782	2.67916	0.124574	331.391	2.38573	7.623
	sample	grain	spot	Core/Rim	238U/206Pb	1σ 238U/206Pb	207Pb/206Pb	1σ 207Pb/206Pb	Correlation of TW Concordia Ellipses	204Pb/206Pb	1σ 204Pb/206 Pb	% 206Pb*	206Pb/238U age [Ma]	1σ 206Pb/238U age [Ma]	U (ppm)	U/Th	UO/U	Comments
Panizos	Panizos
2011_08_22Aug\ 07BOL05@1.ais	07BOL05	1	1	R	11.956	0.413114	0.05869	0.000436	-0.0328921	n.d.	n.d.	99.8665	517.229	17.2426	521.971	2.3077	8.296
2011_08_22Aug\ 07BOL05@2.ais	07BOL06	2	1	R	21.9202	0.826452	0.05938	0.000857	0.0611825	6.816e-05	3.408e-05	99.0479	284.994	10.6347	565.022	7.16331	8.028
2011_08_22Aug\ 07BOL05@3.ais	07BOL07	3	1	R	626.959	138.756	0.2147	0.0936	-0.60895	0.00426	0.002213	78.4534	8.16488	2.85337	343.38	9.04964	7.861	206Pb* <80%
2011_08_22Aug\ 07BOL05@4.ais	07BOL08	4	1	R	277.778	10.4938	0.5714	0.00839	-0.0619668	0.03718	0.003622	32.8535	7.70149	1.11772	414.239	1.8942	8.074	206Pb* <80%
2011_08_22Aug\ 07BOL05@5.ais	07BOL09	5	1	R	831.255	33.7201	0.05947	0.00305	0.0752152	0.001717	0.0008583	98.3039	7.70061	0.316066	903.046	1.89026	8.084
2011_08_22Aug\ 07BOL05@6.ais	07BOL10	6	1	R	896.861	32.4961	0.05837	0.00338	-0.132138	0.001469	0.0008927	98.4445	7.17749	0.26278	733.725	14.2164	8.238
2011_08_22Aug\ 07BOL05@7.ais	07BOL11	7	1	R	798.722	31.834	0.06315	0.00369	-0.00655598	0.002373	0.001146	97.8333	7.98878	0.324195	729.399	4.51694	7.842
2011_08_22Aug\ 07BOL05@8.ais	07BOL12	8	1	R	853.971	36.1716	0.07717	0.00569	-0.120455	0.001691	0.001028	96.0379	7.30866	0.325596	629.702	1.12825	8.093
2011_08_22Aug\ 07BOL05@9.ais	07BOL13	9	1	R	903.342	38.2717	0.06853	0.00524	-0.190408	0.005578	0.002496	97.1421	7.00817	0.307267	334.523	1.76425	8.041
2011_08_22Aug\ 07BOL05@10.ais	07BOL14	10	1	R	892.061	31.8309	0.05618	0.00395	-0.1758	0.0007035	0.0006192	98.7228	7.22716	0.26094	698.707	4.28722	8.122
2011_08_22Aug\ 07BOL05@11.ais	07BOL15	11	1	R	581.734	26.5655	0.2856	0.00492	-0.0394452	0.01891	0.002492	69.3958	7.77543	0.541528	951.453	2.72251	7.725	206Pb* <80%
2011_08_22Aug\ 07BOL05@12.ais	07BOL16	12	1	R	11.9374	0.450308	0.05664	0.000258	0.00161526	n.d.	n.d.	100.141	519.355	18.8378	1430.58	1.45183	7.767
2011_08_22Aug\ 07BOL05@13.ais	07BOL17	13	1	R	13.0976	0.495769	0.05686	0.000594	-0.0345944	n.d.	n.d.	99.9598	474.201	17.3565	328.343	3.02836	7.999
2011_08_22Aug\ 07BOL05@14.ais	07BOL18	14	1	R	7.82473	0.287152	0.06492	0.00029	0.00661765	n.d.	n.d.	100.014	775.485	26.8881	440.812	2.36152	7.902
2011_08_22Aug\ 07BOL05@15.ais	07BOL19	15	1	R	887.311	32.5951	0.06262	0.00356	-0.100219	0.002084	0.001082	97.8979	7.21504	0.269456	646.799	20.7798	8.155
2011_08_22Aug\ 07BOL05@16.ais	07BOL20	16	1	R	800	40.64	0.1409	0.0226	-0.0922633	0.01083	0.005633	87.8925	7.1715	0.472042	108.864	3.22789	7.97
2011_08_22Aug\ 07BOL05@17.ais	07BOL21	17	1	R	952.381	35.5556	0.06836	0.0113	0.0472899	0.008553	0.003496	97.1646	6.67322	0.269029	285.704	5.56578	7.974
2011_08_22Aug\ 07BOL05@18.ais	07BOL22	18	1	R	14.0272	0.513551	0.05702	0.000333	0.0201084	n.d.	n.d.	99.8379	443.292	15.7428	2675.77	1.32056	7.844
2011_08_22Aug\ 07BOL05@19.ais	07BOL23	19	1	R	871.84	39.9055	0.05224	0.00264	-0.221607	0.002748	0.001195	99.2232	7.43186	0.340117	718.894	5.38331	8.042
2011_08_22Aug\ 07BOL05@20.ais	07BOL24	20	1	R	860.585	39.5484	0.07129	0.00839	-0.286446	0.009338	0.003534	96.7915	7.33441	0.355484	281.996	2.47441	7.997
2011_08_22Aug\ 07BOL05@21.ais	07BOL25	21	1	R	819.001	37.7639	0.1351	0.0109	0.0765302	0.007369	0.004258	88.634	7.06376	0.37996	144.376	2.88528	8.146
2011_08_22Aug\ 07BOL05@22.ais	07BOL26	22	1	R	5.97372	0.219821	0.2108	0.00121	0.0362605	n.d.	n.d.	81.0601	820.354	35.9822	355.945	3.60332	8.128
2011_08_22Aug\ 07BOL05@23.ais	07BOL27	23	1	R	861.326	39.7649	0.0944	0.00792	0.0712928	0.009982	0.00447	93.8358	7.1146	0.353827	195.44	3.81728	7.948
2011_08_22Aug\ 07BOL05@24.ais	07BOL28	24	1	R	3.33111	0.117621	0.1055	0.000275	-0.0107853	n.d.	n.d.	99.7163	1688.14	53.0242	603.129	2.52692	8.004
2011_08_22Aug\ 07BOL05@25.ais	07BOL29	25	1	R	836.12	34.1159	0.05258	0.00383	0.150286	0.002554	0.001111	99.1861	7.74247	0.316419	763.387	5.62879	7.95
2011_08_22Aug\ 07BOL05@26.ais	07BOL30	26	1	R	10.9649	0.430421	0.06396	0.000566	0.0194761	0.0004445	9.237e-05	99.3278	559.089	21.2231	260.779	2.61618	7.842
2011_08_22Aug\ 07BOL05@27.ais	07BOL31	27	1	R	11.5181	0.429839	0.05853	0.000727	0.0598227	0.0001036	4.633e-05	99.9548	536.557	19.2632	233.383	3.64532	8.041
2011_08_22Aug\ 07BOL05@28.ais	07BOL32	28	1	R	873.362	36.3075	0.06616	0.00663	0.012361	0.003358	0.00168	97.4416	7.27704	0.312976	440.194	2.55317	7.974
2011_08_22Aug\ 07BOL05@29.ais	07BOL33	29	1	R	874.891	31.0001	0.05735	0.00255	-0.0422077	8.898e-05	0.0001653	98.5742	7.36488	0.262471	1239.22	15.7785	8.191
2011_08_22Aug\ 07BOL05@30.ais	07BOL34	30	1	R	13.7514	0.465187	0.0567	0.000286	-0.00943489	n.d.	n.d.	99.9087	452.199	14.8199	1002.13	1.89289	8.258
2011_08_22Aug\ 07BOL05@31.ais	07BOL35	31	1	R	21.4316	0.725718	0.07265	0.00164	0.0099957	0.001006	0.0001969	97.3424	286.436	9.79488	234.619	4.96457	8.154
2011_08_22Aug\ 07BOL05@32.ais	07BOL36	32	1	R	777.001	29.8846	0.1888	0.0126	0.336179	0.01306	0.004942	81.7665	6.87272	0.340171	162.112	3.13075	8.249
2011_08_22Aug\ 07BOL05@33.ais	07BOL37	33	1	R	903.342	36.558	0.07195	0.00759	-0.225583	0.003341	0.002031	96.7064	6.99449	0.29824	365.215	4.31216	8.338
2011_08_22Aug\ 07BOL05@34.ais	07BOL38	34	1	R	16.592	0.473507	0.0564	0.000453	-0.0164773	n.d.	n.d.	99.7057	376.267	11.1849	1021.69	1.97034	8.54
	sample	grain	spot	Core/Rim	238U/206Pb	1σ 238U/206Pb	207Pb/206Pb	1σ 207Pb/206Pb	Correlation of TW Concordia Ellipses	204Pb/206Pb	1σ 204Pb/206 Pb	% 206Pb*	206Pb/238U age [Ma]	1σ 206Pb/238U age [Ma]	U (ppm)	U/Th	UO/U	Comments
Pastos Grandes	Pastos Grandes
2011_08-18Aug\ BOL07027@1.ais	BOL07027	1	1	C	645.578	24.2144	0.04898	0.00166	0.00108979	0.0001576	0.0001576	99.6497	10.0402	0.375126	1840.42	4.45061	7.599
2011_08-18Aug\ BOL07027@2.ais	BOL07027	1	2	R	1335.83	50.321	0.1676	0.00701	0.0589677	0.01214	0.002779	84.4684	4.17448	0.188973	933.819	5.40118	7.708
2011_08-18Aug\ BOL07027@3.ais	BOL07027	2	1	C	2004.41	73.9249	0.06506	0.0041	-0.114938	0.0005964	0.0005965	97.5756	3.21946	0.120151	1450.9	1.91921	7.725
2011_08-18Aug\ BOL07027@4.ais	BOL07027	3	1	C	1667.22	60.318	0.0826	0.00406	-0.0214583	0.00665	0.001352	95.3357	3.75977	0.141803	3941.51	1.50463	7.708
2011_08-18Aug\ BOL07027@5.ais	BOL07027	3	2	R	1183.01	51.6422	0.3213	0.00744	-0.054362	0.02021	0.003404	64.8155	3.63298	0.262135	1086.37	7.33072	7.393	206Pb* <80%
2011_08-18Aug\ BOL07027@6.ais	BOL07027	4	1	C	983.284	41.9612	0.1575	0.00733	0.0493168	0.007691	0.002308	85.7687	5.7202	0.28944	706.288	5.49675	7.508
2011_08-18Aug\ BOL07027@7.ais	BOL07027	5	1	R	2000	72.4	0.06559	0.00598	0.00635168	0.001071	0.0007575	97.5104	3.24051	0.119226	1765.07	4.79803	7.698
2011_08-18Aug\ BOL07027@8.ais	BOL07027	6	1	R	1966.18	73.4515	0.06162	0.00442	0.0135028	0.001492	0.0008618	98.017	3.31179	0.123957	1783.03	5.10025	7.716
2011_08-18Aug\ BOL07027@10.ais	BOL07027	7	1	R	1937.98	79.6226	0.07016	0.00458	0.040094	0.0072	0.002442	96.926	3.32398	0.138212	1141.72	6.14381	7.546
2011_08-18Aug\ BOL07027@9.ais	BOL07027	7	2	C	1961.17	77.3083	0.06603	0.00434	0.115926	0.002114	0.001284	97.4533	3.30209	0.130839	1158.94	5.42572	7.734
2011_08-18Aug\ BOL07027@11.ais	BOL07027	8	1	R	1572.08	67.4702	0.1995	0.0118	-0.146693	0.009537	0.003021	80.3855	3.39626	0.192839	1352.04	6.25875	7.569
2011_08-18Aug\ BOL07027@14.ais	BOL07027	9	1	R	798.722	37.0653	0.5417	0.0101	0.00461117	0.03691	0.003299	36.6562	3.05653	0.456177	1418.32	4.9853	7.415	206Pb* <80%
2011_08-18Aug\ BOL07027@16.ais	BOL07027	10	1	R	2053.81	82.6754	0.05576	0.00399	0.165218	0.001005	0.0006108	98.7644	3.19716	0.127261	2288.26	4.63272	7.541
2011_08-18Aug\ BOL07027@17.ais	BOL07027	11	1	R	1961.94	69.6706	0.05578	0.00235	0.0101292	0.0002785	0.0002785	98.7636	3.34713	0.117237	2771.46	8.24642	7.798
2011_08-18Aug\ BOL07027@18.ais	BOL07027	12	1	R	1893.58	72.0715	0.06671	0.00301	-0.0370403	0.004689	0.001484	97.3653	3.41438	0.130558	1664.91	6.07019	7.616
2011_08_26Aug\ BOL07027@22.ais	BOL07027	13	1	R	1689.19	61.6326	0.09222	0.00586	0.255936	0.002028	0.001434	94.1063	3.67414	0.1417	1262.05	2.0485	8.07
2011_08_26Aug\ BOL07027@23.ais	BOL07027	14	1	R	2024.7	56.162	0.05767	0.00386	0.387885	0.001612	0.001065	98.5221	3.21859	0.0893092	2279.79	1.95166	8.158
2011_08_26Aug\ BOL07027@24.ais	BOL07027	15	1	C	2106.15	41.6528	0.07207	0.00532	-0.0187744	0.001256	0.001105	96.6784	3.05179	0.0638165	1545.18	3.2935	8.337
2011_08_26Aug\ BOL07027@25.ais	BOL07027	15	2	R	1814.22	52.3334	0.06347	0.00429	-0.115131	0.002169	0.001126	97.7804	3.57341	0.104543	2285.74	5.6544	8.227
2011_08_26Aug\ BOL07027@26.ais	BOL07027	16	1	R	1733.4	50.4787	0.06813	0.00713	0.0690015	0.001879	0.001438	97.1859	3.71376	0.112984	1181.81	6.00946	8.211
2011_08_26Aug\ BOL07027@27.ais	BOL07027	17	1	R	1411.63	49.8176	0.05382	0.00367	0.03531	n.d.	n.d.	99.0169	4.6113	0.162569	1936.66	2.88888	8.278
2011_08_26Aug\ BOL07027@28.ais	BOL07027	18	1	R	1666.94	43.6257	0.05634	0.00426	-0.203179	0.0006932	0.0006102	98.6934	3.91321	0.103604	2135.25	4.52929	8.359
2011_08_26Aug\ BOL07027@29.ais	BOL07027	19	1	R	2135.38	70.6779	0.07703	0.00812	0.16554	0.005147	0.002373	96.0455	2.99693	0.104073	1325.87	4.70566	8.439
2011_08_26Aug\ BOL07027@30.ais	BOL07027	20	1	R	1797.27	40.0541	0.05806	0.00288	-0.226212	0.001201	0.0006007	98.4729	3.60982	0.0812815	4419.57	1.71073	8.284
2011_08_26Aug\ BOL07027@31.ais	BOL07027	21	1	C	372.024	8.52555	0.05726	0.00203	0.160445	0.0002613	0.0001999	98.6083	17.1623	0.39862	1821.88	4.81172	8.156
2011_08_26Aug\ BOL07027@32.ais	BOL07027	21	2	R	1786.03	36.046	0.06147	0.00298	0.190807	0.001506	0.0007823	98.0374	3.63105	0.0739372	3298.01	3.32463	8.152
2011_08_26Aug\ BOL07027@33.ais	BOL07027	22	1	R	2025.11	49.623	0.06783	0.00479	-0.0623308	0.0007424	0.0007424	97.2211	3.19255	0.0804362	1968.09	4.8878	8.265
2011_08_26Aug\ BOL07027@34.ais	BOL07027	23	1	R	2134.93	52.416	0.06045	0.00329	0.0301268	0.0006079	0.0006081	98.1659	3.05931	0.075213	2277.41	3.9137	8.543
2011_08_26Aug\ BOL07027@35.ais	BOL07027	24	1	R	1893.58	50.9162	0.05731	0.00385	0.125234	0.0002358	0.0004376	98.5681	3.44799	0.0928951	1650.43	3.2716	8.293
2011_08_26Aug\ BOL07027@36.ais	BOL07027	25	1	R	2094.68	58.7949	0.08034	0.0117	-0.153019	0.001198	0.001198	95.6215	3.04128	0.0975281	1187.76	5.21173	8.65
2011_08_26Aug\ BOL07027@37.ais	BOL07027	26	1	C	1910.58	39.4236	0.05978	0.00481	0.427584	0.0007828	0.0007831	98.2524	3.41295	0.0718743	1817.12	4.98348	8.39
2011_08_26Aug\ BOL07027@38.ais	BOL07027	26	2	R	1868.46	47.1304	0.05256	0.00426	-0.170481	0.002737	0.001422	99.1766	3.51989	0.0891287	1788.3	5.17023	8.446
2011_08_26Aug\ BOL07027@39.ais	BOL07027	27	1	C	1746.11	47.868	0.06236	0.0054	-0.351274	0.003216	0.00153	97.9234	3.71315	0.104948	1762.11	5.10683	8.308
2011_08_26Aug\ BOL07027@40.ais	BOL07027	27	2	R	703.235	18.298	0.5842	0.00924	0.216374	0.0421	0.004167	31.2339	2.95112	0.280907	1268.96	2.52921	8.87	206Pb* <80%
2011_08-18Aug\ BOL07027@41.ais	BOL07027	28	1	R	2041.65	66.6933	0.06209	0.00226	-0.0112658	0.002242	0.0007473	97.9567	3.19202	0.103744	3110.26	5.57424	7.908
2011_08-18Aug\ BOL07027@42.ais	BOL07027	29	1	C	1763.98	64.0995	0.05222	0.00181	-0.0153602	0.001226	0.0004735	99.219	3.69625	0.133233	3967.43	1.37419	7.699
2011_08-18Aug\ BOL07027@43.ais	BOL07027	29	2	R	1822.49	68.0901	0.05515	0.00362	0.0581963	0.0006337	0.0004482	98.8452	3.59699	0.133182	2308.63	6.92389	7.582
2011_08-18Aug\ BOL07027@44.ais	BOL07027	30	1	C	1950.46	74.9445	0.0655	0.00412	-0.0185959	0.0007637	0.0007637	97.5194	3.32328	0.128396	933.633	6.37499	7.836
2011_08-18Aug\ BOL07027@45.ais	BOL07027	30	2	R	2156.1	83.6779	0.05197	0.00304	0.10477	n.d.	n.d.	99.2487	3.06477	0.116624	1742.3	4.68954	7.641
2011_08-18Aug\ BOL07027@46.ais	BOL07027	31	1	C	1746.42	74.7246	0.06621	0.00498	-0.218557	0.0001563	0.0002899	97.4313	3.69602	0.160407	1236.51	6.10119	7.572
2011_08-18Aug\ BOL07027@47.ais	BOL07027	31	2	R	1970.44	78.0412	0.05535	0.0058	-0.0779858	0.0005832	0.0005833	98.8185	3.33215	0.131899	1368.88	5.72019	7.568
2012_03_15Mar\ SDS_PG@10.ais	SDS5	10	1	R	2061.01	89.2026	0.05482	0.00528	0.230972	0.001337	0.0008833	98.8847	3.18576	0.136717	2614.38	3.33881	8.495
2012_03_15Mar\ SDS_PG@11.ais	SDS5	11	1	R	1189.48	49.6621	0.3857	0.0101	-0.0134888	0.02643	0.004028	56.5829	3.16294	0.258682	1504.84	4.33506	8.506	206Pb* <80%
2012_03_15Mar\ SDS_PG@12.ais	SDS5	12	1	R	2014.91	81.1973	0.1093	0.00515	-0.0148717	0.009073	0.00248	91.9211	3.03463	0.131524	2074.66	3.52705	8.624
2012_03_15Mar\ SDS_PG@13.ais	SDS5	13	1	R	1779.68	81.3982	0.1832	0.0064	0.0783506	0.012	0.002605	82.4619	3.079	0.170891	2384.72	3.16378	8.515
2012_03_15Mar\ SDS_PG@14.ais	SDS5	14	1	R	1947.8	80.8105	0.04511	0.00425	0.0120607	n.d.	n.d.	100.128	3.40922	0.138457	2334.65	4.02793	8.436
2012_03_15Mar\ SDS_PG@6.ais	SDS5	6	1	R	1593.63	70.6021	0.05386	0.00312	-0.0886838	0.0005492	0.0005494	99.0106	4.09943	0.180245	2212.84	3.83088	8.459
2012_03_15Mar\ SDS_PG@7.ais	SDS5	7	1	R	2085.07	89.9937	0.0683	0.00788	-0.00811045	0.005508	0.002128	97.1632	3.09883	0.136997	1839.46	3.81657	8.538
2012_03_15Mar\ SDS_PG@8.ais	SDS5	8	1	R	2163.1	93.1119	0.05739	0.00552	0.0907022	0.0007028	0.0007029	98.5571	3.03343	0.129892	2164.93	4.2481	8.575
2012_03_15Mar\ SDS_PG@9.ais	SDS5	9	1	R	855.432	36.515	0.05377	0.00326	-0.138995	0.0002522	0.0002522	99.0336	7.55307	0.323708	2421.8	3.52926	8.509
2012_03_15Mar\ SDS5_PG@1.ais	SDS5	1	1	R	2017.35	90.3473	0.04691	0.00334	0.0887616	n.d.	n.d.	99.8976	3.28612	0.143758	2243.89	3.59531	8.443
2012_03_15Mar\ SDS5_PG@15CORE.ais	SDS5	15	1	C	1816.2	78.8362	0.05945	0.0037	-0.100494	0.000731	0.0007312	98.2935	3.58652	0.155339	1893.38	4.94932	8.448
2012_03_15Mar\ SDS5_PG@16.ais	SDS5	16	1	R	1948.18	86.5351	0.05887	0.00323	0.0188351	n.d.	n.d.	98.3674	3.345	0.147801	2621.61	2.84784	8.426
2012_03_15Mar\ SDS5_PG@17.ais	SDS5	17	1	R	444.05	17.6673	0.6684	0.0108	0.0250334	0.03598	0.003621	20.4597	3.0668	0.753229	1063.33	4.37689	8.551	206Pb* <80%
2012_03_15Mar\ SDS5_PG@18.ais	SDS5	18	1	R	1873.01	70.1633	0.047	0.00354	0.0726905	0.000607	0.0006071	99.8861	3.53064	0.129819	2078.03	3.37184	8.678
2012_03_15Mar\ SDS5_PG@19.ais	SDS5	19	1	R	2037.49	89.2543	0.0562	0.00356	0.0544422	0.001735	0.001054	98.7097	3.21652	0.139436	2330.32	3.47642	8.507
2012_03_15Mar\ SDS5_PG@20.ais	SDS5	20	1	R	1844	79.2276	0.06166	0.00362	0.0205079	0.0007146	0.0007147	98.0129	3.51881	0.151264	2009.18	3.27827	8.408
2012_03_15Mar\ SDS5_PG@21.ais	SDS5	21	1	R	2043.74	90.2201	0.05757	0.00357	0.15961	0.001529	0.0009289	98.536	3.19923	0.139966	2689.01	3.01627	8.467
2012_03_15Mar\ SDS5_PG@22.ais	SDS5	22	1	R	1855.63	83.3295	0.05542	0.00317	0.0391421	0.0006779	0.0006779	98.8097	3.52175	0.156771	2100.9	2.72015	8.446
2012_03_15Mar\ SDS5_PG@23.ais	SDS5	23	1	R	2034.59	96.4515	0.09354	0.00517	0.144786	0.002667	0.001541	93.9354	3.073	0.15189	1716.2	4.43414	8.427
2012_03_15Mar\ SDS5_PG@2CORE.ais	SDS5	2	1	C	1728.61	81.8736	0.05969	0.00605	-0.0213565	n.d.	n.d.	98.2647	3.7615	0.179089	1144.94	4.66641	8.4
2012_03_15Mar\ SDS5_PG@3.ais	SDS5	3	1	R	2157.03	82.8196	0.05624	0.00388	0.0926209	0.001101	0.001101	98.7038	3.02998	0.115688	2102.34	1.83508	8.633
2012_03_15Mar\ SDS5_PG@4.ais	SDS5	4	1	R	1870.91	70.7059	0.133	0.00651	0.0771615	0.006543	0.001816	88.8937	3.14739	0.134061	2510.87	2.16863	8.708
2012_03_15Mar\ SDS5_PG@5.ais	SDS5	5	1	R	2063.98	73.6985	0.06157	0.00377	0.00753248	0.0007518	0.0006619	98.0209	3.16015	0.112649	2377.02	5.33241	8.792
	sample	grain	spot	Core/Rim	238U/206Pb	1σ 238U/206Pb	207Pb/206Pb	1σ 207Pb/206Pb	Correlation of TW Concordia Ellipses	204Pb/206Pb	1σ 204Pb/206 Pb	% 206Pb*	206Pb/238U age [Ma]	1σ 206Pb/238U age [Ma]	U (ppm)	U/Th	UO/U	Comments
Puripica Chico	Puripica Chico
2011_08_15Aug\ 07BOL-023-PD@1.ais	07BOL-023-PD	1	1	R	2758.62	73.2842	0.1741	0.0103	-0.274293	0.01484	0.003244	83.6412	2.04361	0.071575	1537.91	2.62362	7.782
2011_08_15Aug\ 07BOL-023-PD@2.ais	07BOL-023-PD	2	1	R	1394.7	89.0896	0.5107	0.015	0.0413583	0.04033	0.004217	40.6126	1.95511	0.350457	1400.91	1.68013	7.755	206Pb* <80%
2011_08_15Aug\ 07BOL-023-PD@3.ais	07BOL-023-PD	3	1	R	3249.92	87.77	0.07445	0.00574	0.119778	0.001142	0.001142	96.3752	2.00164	0.0553154	1300.2	2.74821	7.76
2011_08_15Aug\ 07BOL-023-PD@4.ais	07BOL-023-PD	4	1	R	3060.91	66.7086	0.07688	0.00764	0.268052	0.005058	0.002263	96.0633	2.11554	0.0495159	1177.46	3.16069	8.046
2011_08_15Aug\ 07BOL-023-PD@5.ais	07BOL-023-PD	5	1	R	2961.21	77.3404	0.07882	0.00683	-0.00918181	0.005254	0.002351	95.8153	2.17657	0.0598267	1054.71	2.86917	8.052
2011_08_15Aug\ 07BOL-023-PD@6.ais	07BOL-023-PD	6	1	R	3563.79	95.7626	0.08481	0.00817	0.0384848	0.002668	0.001887	95.0493	1.81208	0.0518973	1100.99	3.21391	7.855
2011_08_15Aug\ 07BOL-023-PD@7.ais	07BOL-023-PD	7	1	R	3505.08	95.0906	0.09146	0.00963	-0.238307	0.006861	0.003629	94.201	1.82733	0.0550657	768.493	3.68081	7.822
2011_08_15Aug\ 07BOL-023-PD@8.ais	07BOL-023-PD	8	1	C	3405.99	77.2613	0.08696	0.00584	0.169076	0.008824	0.003181	94.7716	1.88601	0.0449145	1199.49	3.12682	7.808
2011_08_15Aug\ 07BOL-023-PD@9.ais	07BOL-023-PD	9	1	R	2311.6	60.9161	0.1254	0.015	-0.467974	0.009371	0.003082	89.8649	2.60178	0.0927499	1147.46	4.00741	7.831
2011_08_15Aug\ 07BOL-023-PD@10.ais	07BOL-023-PD	10	1	R	3245.7	86.4888	0.1013	0.0062	0.108779	0.00168	0.001337	92.9447	1.93811	0.055095	1167.46	3.09174	7.8
2011_08_15Aug\ 07BOL-023-PD@11.ais	07BOL-023-PD	11	1	R	3112.36	80.497	0.09451	0.00961	-0.0270314	0.0009807	0.001287	93.8058	2.03989	0.0590093	661.671	4.3594	7.986
2011_08_15Aug\ 07BOL-023-PD@12.ais	07BOL-023-PD	12	1	R	2992.22	76.9096	0.06708	0.00501	-0.0602623	0.004201	0.001937	97.3189	2.18921	0.0570899	1286.13	3.19939	7.892
2011_08_15Aug\ 07BOL-023-PD@13.ais	07BOL-023-PD	13	1	R	3572.7	90.1154	0.07075	0.00555	0.0666219	0.003007	0.002242	96.8475	1.84142	0.0471417	1440.35	3.46792	7.813
2011_08_15Aug\ 07BOL-023-PD@14.ais	07BOL-023-PD	14	1	R	2834.47	79.1369	0.07888	0.00452	0.030074	0.005036	0.001945	95.8079	2.27642	0.0648978	1644.92	4.58922	7.763
2011_08_15Aug\ 07BOL-023-PD@15.ais	07BOL-023-PD	15	1	C	2540.65	58.9978	0.07852	0.00753	0.159356	0.005146	0.002373	95.8549	2.52531	0.0631229	955.664	3.34696	7.928
2011_08_15Aug\ 07-BOL-023-PD@16.ais	07BOL-023-PD	16	1	R	572.41	13.958	0.7297	0.0165	0.0998792	0.04492	0.005205	12.5878	1.51502	0.405418	404.889	4.47431	7.856	206Pb* <80%
2011_08_15Aug\ 07-BOL-023-PD@17.ais	07BOL-023-PD	17	1	R	2572.68	76.7766	0.2652	0.0128	0.0947574	0.02873	0.005752	71.9949	1.89623	0.086049	910.862	3.11593	7.828	206Pb* <80%
2011_08_15Aug\ 07-BOL-023-PD@18.ais	07BOL-023-PD	18	1	R	3163.56	89.072	0.08429	0.00857	0.0481567	0.002264	0.001993	95.1146	2.03041	0.0612242	737.021	3.12561	7.804
2011_08_15Aug\ 07-BOL-023-PD@19.ais	07BOL-023-PD	19	1	R	2933.41	63.7623	0.06809	0.00471	0.143795	0.004148	0.001737	97.1856	2.22857	0.0493475	1804.32	3.25262	7.779
2011_08_15Aug\ 07-BOL-023-PD@20.ais	07BOL-023-PD	20	1	R	50.6586	3.84943	0.813	0.00485	-0.0140272	0.05128	0.0008915	1.94585	2.56855	13.6532	1265.95	3.19455	8.018	206Pb* <80%
2011_08_15Aug\ 07-BOL-023-PD@21.ais	07BOL-023-PD	21	1	R	2865.33	61.8222	0.06027	0.00398	-0.0717305	0.0005864	0.0005865	98.1875	2.29089	0.0498803	1947.62	1.93052	7.899
2011_08_15Aug\ 07-BOL-023-PD@23.ais	07BOL-023-PD	23	1	R	3454.23	99.5105	0.07971	0.00871	-0.16855	0.007415	0.00332	95.6999	1.8729	0.0577347	978.066	2.36114	7.843
2011_08_15Aug\ 07-BOL-023-PD@24.ais	07BOL-023-PD	24	1	R	3159.56	84.6542	0.07083	0.00672	0.0164387	0.01018	0.003224	96.8392	2.07099	0.0572284	1332.23	3.79935	7.773
2011_08_15Aug\ 07-BOL-023-PD@25.ais	07BOL-023-PD	25	1	R	2577.98	57.7538	0.07837	0.00584	0.403468	0.006236	0.002488	95.8723	2.49017	0.0582953	1056.56	3.26955	8.01
2011_08_15Aug\ 07-BOL-023-PD@26.ais	07BOL-023-PD	26	1	R	2961.21	78.0419	0.07531	0.00519	-0.0296349	0.003271	0.001889	96.2628	2.18899	0.0592056	1212.45	3.36874	7.76
2011_08_15Aug\ 07-BOL-023-PD@27.ais	07BOL-023-PD	27	1	C	1416.23	31.4896	0.06327	0.00507	-0.0369003	0.0001976	0.0003667	97.8085	4.54766	0.105208	879.574	4.33521	7.842
2011_08_15Aug\ 07-BOL-023-PD@28.ais	07BOL-023-PD	28	1	R	3369.27	77.9882	0.08291	0.00587	0.180985	0.007362	0.002845	95.2914	1.90993	0.0462416	1198.19	2.34179	7.839
2011_08_15Aug\ 07-BOL-023-PD@29.ais	07BOL-023-PD	29	1	R	3067.48	72.3588	0.06902	0.00457	0.219794	0.002738	0.001581	97.069	2.13288	0.0508349	1432.39	3.26955	7.761
2011_08_15Aug\ 07-BOL-023-PD@30.ais	07BOL-023-PD	30	1	R	3129.89	74.3533	0.07798	0.00811	0.149414	0.004858	0.002348	95.923	2.06982	0.0527867	1123.03	3.53566	7.778
2011_08_15Aug\ 07-BOL-023-PD@31.ais	07BOL-023-PD	31	1	R	3071.25	72.065	0.07633	0.00637	0.252695	0.004823	0.002661	96.1326	2.11129	0.0516265	947.518	3.3893	7.782
2011_08_15Aug\ 07-BOL-023-PD@32.ais	07BOL-023-PD	31	2	C	2639.22	63.0376	0.05567	0.00403	-0.018255	0.003607	0.001276	98.7739	2.50119	0.0596432	2514.13	2.5825	7.787
2011_08_15Aug\ 07-BOL-023-PD@33.ais	07BOL-023-PD	32	1	R	2806.62	77.6686	0.08869	0.00794	-0.115557	0.007367	0.003143	94.5537	2.2682	0.0678217	862.357	4.20457	8.007
2011_08_15Aug\ 07-BOL-023-PD@34.ais	07BOL-023-PD	33	1	R	2291.48	70.3615	0.3214	0.0261	-0.207225	0.01852	0.005869	64.8005	1.91932	0.133253	531.706	4.13683	7.901	206Pb* <80%
2011_08_15Aug\ 07-BOL-023-PD@35.ais	07BOL-023-PD	33	2	C	2850.63	81.017	0.1661	0.00899	0.379271	0.009437	0.003571	84.6646	2.00023	0.0680902	1233.55	2.23413	7.385
2011_08_15Aug\ 07-BOL-023-PD@36.ais	07BOL-023-PD	34	1	R	2864.51	66.71	0.07377	0.00713	0.243606	0.003735	0.00206	96.4632	2.26246	0.0556187	1114.14	3.02279	7.757
2011_08_15Aug\ 07-BOL-023-PD@37.ais	07BOL-023-PD	35	1	R	3005.71	128.287	0.1871	0.0185	-0.425573	0.008173	0.003557	81.9768	1.84987	0.110357	791.08	3.01553	7.794
2011_08_15Aug\ 07-BOL-023-PD@38.ais	07BOL-023-PD	36	1	R	2798.77	61.8032	0.1822	0.0105	0.0186991	0.006269	0.002422	82.6063	1.99595	0.0594091	1169.12	3.32882	7.958
2011_08_15Aug\ 07-BOL-023-PD@39.ais	07BOL-023-PD	37	1	R	2961.21	70.2377	0.07157	0.00449	-0.334714	0.002437	0.001408	96.7433	2.19536	0.0535323	1534.77	2.66233	7.842
2011_08_15Aug\ 07-BOL-023-PD@40.ais	07BOL-023-PD	38	1	R	3243.59	73.5411	0.08557	0.00886	-0.0585474	0.004962	0.002482	94.9501	1.98047	0.0500983	1050.64	3.35543	7.94
2011_08_15Aug\ 07-BOL-023-PD@41.ais	07BOL-023-PD	39	1	R	2965.6	86.6286	0.1831	0.0128	-0.174938	0.009429	0.003338	82.4829	1.88659	0.0744269	1064.89	3.40019	7.875
2011_08_15Aug\ 07-BOL-023-PD@42.ais	07BOL-023-PD	39	2	C	2977.08	75.7785	0.08799	0.00624	0.00309492	0.006107	0.002951	94.6432	2.14419	0.0577252	845.88	3.71105	7.903
2011_08_15Aug\ 07-BOL-023-PD@43.ais	07BOL-023-PD	40	1	R	3461.41	101.122	0.1105	0.00999	0.420149	0.01127	0.004607	91.7663	1.79726	0.0581158	894.2	2.50871	7.667
2011_08_15Aug\ 07-BOL-023-PD@44.ais	07BOL-023-PD	41	1	R	2442.6	63.2427	0.1701	0.0056	-0.227931	0.01477	0.003197	84.1501	2.31175	0.0732348	1481.63	2.90425	7.891
2011_08_15Aug\ 07-BOL-023-PD@45.ais	07BOL-023-PD	42	1	C	2317.5	106.342	0.2134	0.0244	-0.444971	0.009008	0.004509	78.6239	2.28601	0.164788	434.696	5.30289	7.866	206Pb* <80%
2011_08_15Aug\ 07-BOL-023-PD@46.ais	07BOL-023-PD	43	1	R	3103.66	50.3791	0.06057	0.00289	0.0502806	0.002322	0.0009259	98.1477	2.11504	0.0345191	2880.69	1.60514	8.094
2011_08_15Aug\ 07-BOL-023-PD@47.ais	07BOL-023-PD	44	1	R	3543.59	87.2712	0.1018	0.00672	-0.177893	0.0009202	0.001093	92.8798	1.78161	0.0478058	988.433	3.05908	8.033
2011_08_15Aug\ 07-BOL-023-PD@48.ais	07BOL-023-PD	45	1	R	499.5	18.8872	0.6849	0.0175	-0.28775	0.04621	0.004133	18.359	2.46742	0.804011	661.115	4.86985	7.648	206Pb* <80%
2011_08_15Aug\ 07-BOL-023-PD@49.ais	07BOL-023-PD	46	1	R	2773.93	69.0981	0.122	0.00985	-0.151289	0.007902	0.003054	90.3004	2.19451	0.0652332	1005.1	4.04974	7.732
2011_08_15Aug\ 07-BOL-023-PD@50.ais	07BOL-023-PD	47	1	R	1415.03	100.916	0.533	0.0296	-0.302845	0.04059	0.004953	37.7455	1.8139	0.47494	947.889	3.55864	7.883	206Pb* <80%
2011_08_15Aug\ 07-BOL-023-PD@51.ais	07BOL-023-PD	48	1	R	2333.72	58.275	0.06458	0.00398	-0.185836	0.003544	0.001773	97.636	2.79209	0.0706259	1026.94	3.85137	7.93
2011_08_15Aug\ 07-BOL-023-PD@52.ais	07BOL-023-PD	49	1	R	3133.81	98.1097	0.09367	0.0107	0.539166	0.007988	0.003476	93.9171	2.02831	0.0685325	867.355	4.16103	7.876
	sample	grain	spot	Core/Rim	238U/206Pb	1σ 238U/206Pb	207Pb/206Pb	1σ 207Pb/206Pb	Correlation of TW Concordia Ellipses	204Pb/206Pb	1σ 204Pb/206 Pb	% 206Pb*	206Pb/238U age [Ma]	1σ 206Pb/238U age [Ma]	U (ppm)	U/Th	UO/U	Comments
Puripicar	Puripicar
2011_08_14Aug\ 83015_z@1.ais	83015	1	1	R	1203.22	48.4996	0.1364	0.0118	-0.059112	0.01794	0.007094	88.4601	4.82694	0.232207	191.614	2.62433	7.928
2011_08_14Aug\ 83015_z@2.ais	83015	2	1	R	1382.55	27.716	0.07074	0.00608	-0.179851	0.00257	0.001358	96.8536	4.60806	0.100239	984.916	3.35837	7.796
2011_08_14Aug\ 83015_z@3.ais	83015	3	1	R	1496.78	30.9169	0.07536	0.00607	-0.357711	0.002176	0.001438	96.2637	4.24271	0.0957002	669.261	4.71731	7.892
2011_08_14Aug\ 83015_z@4.ais	83015	4	1	R	842.46	16.8918	0.05745	0.00249	-0.039791	0.001703	0.0007403	98.563	7.64014	0.155369	1162.64	8.04929	7.87
2011_08_14Aug\ 83015_z@5.ais	83015	5	1	C	1430.82	27.4331	0.06714	0.00316	-0.140665	0.001645	0.0008544	97.3137	4.47831	0.0884991	1387.58	3.79256	7.889
2011_08_14Aug\ 83015_z@6.ais	83015	6	1	R	162.866	5.94171	0.7491	0.00763	-0.0646716	0.04697	0.002913	10.1219	4.08769	2.05488	571.695	1.95745	7.702	206Pb* <80%
2011_08_14Aug\ 83015_z@7.ais	83015	7	1	R	1500.38	31.0655	0.06668	0.00403	0.211468	0.002173	0.001449	97.3731	4.2832	0.0912136	1103.59	6.30774	7.887
2011_08_14Aug\ 83015_z@8.ais	83015	8	1	R	1353.73	27.1222	0.06747	0.00399	0.300754	0.001749	0.001062	97.2721	4.72335	0.0977868	889.756	3.21084	8.001
2011_08_14Aug\ 83015_z@9.ais	83015	9	1	C	1094.45	32.9401	0.1102	0.0103	0.193111	n.d.	n.d.	91.8141	5.49468	0.19131	260.114	2.58475	7.909
2011_08_14Aug\ 83015_z@10.ais	83015	10	1	R	1469.72	30.8893	0.09936	0.00744	-0.245556	0.004986	0.002892	93.1943	4.17406	0.101876	372.491	2.42642	7.899
2011_08_14Aug\ 83015_z@11.ais	83015	11	1	R	1270.81	27.2928	0.06766	0.00437	0.164407	0.001653	0.001169	97.2498	5.02073	0.112042	653.34	2.63992	8.077
2011_08_14Aug\ 83015_z@12.ais	83015	13	1	C	1403.51	27.1837	0.07419	0.00425	-0.284467	0.002547	0.001323	96.4131	4.50901	0.0929622	786.266	1.92986	7.889
2011_08_14Aug\ 83015_z@13.ais	83015	14	1	R	1194.46	30.2467	0.09401	0.0101	-0.247969	0.00892	0.003646	93.8821	5.15186	0.15399	334.538	2.35806	7.853
2011_08_14Aug\ 83015_z@14.ais	83015	16	1	R	1128.41	22.7924	0.2278	0.00674	0.151771	0.008503	0.002101	76.7785	4.46392	0.125907	1008.43	1.73556	7.994	206Pb* <80%
2011_08_14Aug\ 83015_z@15.ais	83015	17	1	R	1137.92	18.1279	0.05065	0.00208	0.160255	0.0004287	0.0001794	99.4253	5.73075	0.0912874	6350.11	6.15421	7.806
2011_08_14Aug\ 83015_z@16.ais	83015	19	1	C	1308.73	25.1778	0.05871	0.00307	-0.255948	0.001632	0.0009424	98.3931	4.93534	0.0970317	982.324	2.80544	7.807
2011_08_14Aug\ 83015_z@17.ais	83015	20	1	C	1441.34	32.4083	0.08409	0.00625	0.0757472	0.003068	0.001772	95.1467	4.34024	0.106154	556.329	2.2645	7.972
2011_08_14Aug\ 83015_z@18.ais	83015	21	1	R	1389.27	41.3038	0.1397	0.0141	0.291012	0.002497	0.002497	88.0295	4.16306	0.156996	227.715	1.76314	7.788
2011_08_14Aug\ 83015_z@19.ais	83015	22	1	R	1096.61	44.3743	0.2071	0.0218	-0.400116	0.007398	0.002953	79.4198	4.75584	0.304997	390.634	2.56196	8.047	206Pb* <80%
2011_08_14Aug\ 83015_z@20.ais	83015	23	1	R	1418.04	40.2166	0.09046	0.00742	-0.15656	0.008357	0.003134	94.3317	4.37823	0.136514	469.686	2.91818	7.812
2011_08_14Aug\ 83015_z@21.ais	83015	24	1	R	1424.1	49.2816	0.09801	0.0115	0.175282	0.009268	0.004341	93.3671	4.30973	0.168248	308.804	2.12537	7.888
2011_08_14Aug\ 83015_z@22.ais	83015	25	1	R	1448.44	52.2394	0.08222	0.00389	-0.362585	0.008235	0.002439	95.3865	4.32866	0.163817	905.493	2.13376	7.969
2011_08_14Aug\ 83015_z@23.ais	83015	26	1	R	1497.01	30.0298	0.05758	0.00518	0.140636	n.d.	n.d.	98.5362	4.3416	0.0903205	1053.97	5.58929	8.276
2011_08_14Aug\ 83015_z@24.ais	83015	27	1	R	1384.08	39.08	0.08812	0.00605	-0.245451	0.002978	0.002107	94.6308	4.49819	0.137456	391.004	3.07531	8.065
2011_08_14Aug\ 83015_z@25.ais	83015	28	1	R	1341.56	30.9563	0.06196	0.00398	0.326808	0.001381	0.0009763	97.9781	4.80165	0.112889	852.915	3.77817	7.977
2011_08_14Aug\ 83015_z@26.ais	83015	29	1	R	1205.11	40.0832	0.106	0.00928	0.312895	0.007722	0.004262	92.3555	5.03152	0.186577	217.348	3.24323	8.131
2011_08_14Aug\ 83015_z@27.ais	83015	30	1	C	1333.87	26.3322	0.1138	0.00546	0.0212318	0.004761	0.001684	91.3402	4.51316	0.101192	1022.31	5.89874	7.895
2011_08_14Aug\ 83015_z@28.ais	83015	31	1	R	1425.11	38.3848	0.07218	0.00815	0.139981	0.0008056	0.0008055	96.67	4.45064	0.129441	711.842	1.74155	8.081
2011_08_14Aug\ 83015_z@29.ais	83015	32	1	R	1264.06	36.4311	0.1253	0.00917	0.182581	0.00891	0.00411	89.8754	4.6752	0.157203	309.73	3.3044	7.914
2011_08_14Aug\ 83015_z@30.ais	83015	33	1	C	21.1551	0.72501	0.06285	0.00205	-0.0868801	8.228e-05	8.228e-05	98.6271	293.803	10.0407	114.802	1.12385	8.082
2011_08_14Aug\ 83015_z@31.ais	83015	34	1	R	1383.89	48.8365	0.1081	0.00878	-0.183702	0.0005561	0.001031	92.0772	4.38815	0.174122	298.437	5.99109	8.033
2011_08_14Aug\ 83015_z@32.ais	83015	35	1	C	1421.06	32.9164	0.09098	0.0106	-0.497299	0.004424	0.002557	94.2662	4.35959	0.123504	410.999	2.13256	7.905
2011_08_14Aug\ 83015_z@33.ais	83015	36	1	C	1336.72	43.5984	0.09827	0.007	0.0611062	0.004658	0.002691	93.3296	4.58869	0.163029	361.383	2.63152	7.949
2011_08_14Aug\ 83015_z@34.ais	83015	37	1	R	1388.12	28.325	0.05602	0.00323	0.232446	0.00101	0.0007142	98.7352	4.67598	0.096306	1103.59	3.0969	7.85
2011_08_14Aug\ 83015_z@35.ais	83015	38	1	C	1390.43	32.8662	0.1424	0.0102	0.115246	0.007017	0.002939	87.6923	4.158	0.123804	459.689	3.35237	7.796
2011_08_14Aug\ 83015_z@36.ais	83015	39	1	C	1114.21	27.4362	0.07651	0.00473	0.03108	0.004011	0.001938	96.1196	5.64383	0.146561	527.633	2.16135	7.81
2011_08_14Aug\ 83015_z@37.ais	83015	40	1	C	1354.65	33.0312	0.09032	0.00972	0.272176	0.003779	0.002084	94.3506	4.58124	0.127688	497.456	3.20245	7.781
2011_08_14Aug\ 83015_z@38.ais	83015	41	1	C	1427.55	34.2368	0.06946	0.00544	-0.0691967	0.002627	0.001597	97.0169	4.4724	0.112701	620.386	3.19765	7.74
2011_08_14Aug\ 83015_z@39.ais	83015	42	1	C	1388.89	28.1636	0.07473	0.00501	-0.107988	n.d.	n.d.	96.3433	4.55572	0.0987503	712.027	2.20573	7.724
2011_08_14Aug\ 83015_z@40.ais	83015	43	1	R	1377.6	35.2988	0.08104	0.00619	-0.0795393	0.003371	0.002049	95.537	4.55741	0.125583	480.979	2.50079	7.853
2011_08_14Aug\ 83015_z@41.ais	83015	44	1	R	1389.08	34.153	0.0696	0.00819	-0.0534872	0.004512	0.002179	96.9989	4.59288	0.123358	557.625	3.21204	7.855
2011_08_14Aug\ 83015_z@42.ais	83015	45	1	R	1394.31	18.8772	0.0523	0.00218	0.282791	0.0005603	0.0002909	99.2113	4.68985	0.0639705	3041.76	11.4412	7.851
2011_08_14Aug\ 83015_z@43.ais	83015	46	1	R	1423.08	27.1372	0.06272	0.00433	0.138548	0.0005213	0.0005215	97.8801	4.5231	0.0894597	1034.16	2.82823	7.97
2011_08_14Aug\ 83015_z@44.ais	83015	47	1	R	1480.38	33.0922	0.07524	0.0055	0.194745	0.001054	0.001053	96.2774	4.29051	0.101312	513.933	5.3554	8.024
2011_08_14Aug\ 83015_z@45.ais	83015	48	1	R	1213.89	37.8695	0.103	0.0144	-0.611309	0.004284	0.001477	92.7296	5.01841	0.197441	993.247	3.9113	8.852
2011_08_14Aug\ 83015_z@46.ais	83015	49	1	R	1315.96	37.7523	0.08363	0.00818	0.0338367	0.001216	0.001216	95.2054	4.75631	0.148913	396.188	3.49031	7.774
2011_08_14Aug\ 83015_z@47.ais	83015	50	1	C	1326.96	42.9643	0.07518	0.00559	0.151062	0.0003035	0.0005629	96.2862	4.77218	0.160653	522.45	4.04564	7.937
2011_08_14Aug\ 83015_z@48.ais	83015	51	1	R	1337.61	26.8382	0.06647	0.0072	0.141946	0.002586	0.001343	97.401	4.77457	0.105061	821.072	1.92866	8.081
2011_08_14Aug\ 83015_z@49.ais	83015	52	1	R	1370.99	40.5996	0.08978	0.00776	0.232247	0.01008	0.004224	94.4183	4.53555	0.145536	323.615	4.47383	7.899
2011_08_14Aug\ 83015_z@50.ais	83015	53	1	R	1566.17	34.831	0.08279	0.0113	0.177537	0.005068	0.002337	95.3112	4.01605	0.106649	548.924	3.47831	7.804
2008_05_10May\ 83015_1_1rim.ais	83015	1	1	R	1476.23	38.1371	0.05892	0.0038	0.0974043	0.004642	0.003528	98.3535	4.37848	0.114632	1440.05	1.87053	8.751
2008_05_10May\ 83015_1_2core.ais	83015	1	2	C	1440.92	35.7116	0.05976	0.00344	-0.0462795	0.01038	0.003748	98.2459	4.47199	0.112699	1920.6	1.45657	8.709
2008_05_10May\ 83015_18_1core.ais	83015	18	1	C	1242.54	44.0016	0.06387	0.00553	-0.0494102	0.005701	0.002553	97.7185	5.15	0.187507	550.005	1.68152	8.822
2008_05_10May\ 83015_18_2rim.ais	83015	18	2	R	1322.23	27.9725	0.05507	0.0035	-0.232223	0.0007774	0.0004307	98.8497	4.9152	0.105703	2868.48	3.93622	8.884
2008_05_10May\ 83015_2_1core.ais	83015	2	1	C	1423.89	49.0648	0.06703	0.00706	-0.299465	0.02242	0.008395	97.3093	4.47965	0.162171	769.96	1.34768	8.74
2008_05_10May\ 83015_2_2rim.ais	83015	2	2	R	1510.12	40.8202	0.05273	0.00454	-0.364215	0.008081	0.004565	99.1492	4.32239	0.118529	1231.7	2.52793	8.887
2008_05_10May\ 83015_20_1core@1.ais	83015	20	1	C	1226.24	44.9597	0.05758	0.00511	-0.0823458	0.00134	0.001016	98.5272	5.25644	0.195978	815.716	1.49252	8.802
2008_05_10May\ 83015_20_2rim@2.ais	83015	20	2	R	137.608	3.74934	0.7627	0.00557	0.0191814	0.04252	0.002589	7.76248	3.72649	1.74091	959.024	2.50123	8.445	206Pb* <80%
2008_05_10May\ 83015_3_1core.ais	83015	3	1	C	1327.14	31.7034	0.05282	0.00261	-0.196661	0.007899	0.002923	99.1393	4.91048	0.117433	2057.87	3.63628	8.858
2008_05_10May\ 83015_3_2rim.ais	83015	3	1	R	1418.64	42.6659	0.0579	0.00556	0.0168191	0.003917	0.002172	98.4856	4.56971	0.140225	606.677	3.43803	8.86
2008_05_10May\ 83015_5_1core.ais	83015	5	1	C	1252.19	42.3355	0.05267	0.00507	0.404257	0.002286	0.00145	99.1593	5.17682	0.176306	717.003	1.28502	8.834
2008_05_10May\ 83015_5_2rim.ais	83015	5	1	R	1175.23	29.4186	0.1373	0.00538	0.158979	0.004614	0.001294	88.2635	4.93333	0.142435	1900.86	2.92032	8.557
2008_05_10May\ 83015_6_1core.ais	83015	6	1	C	1423.28	63.4057	0.05964	0.00672	0.545582	0.004746	0.002455	98.2623	4.53433	0.204119	604.122	1.89518	8.817
2008_05_10May\ 83015_7_1core.ais	83015	7	2	C	1423.28	52.0615	0.06694	0.00653	-0.410091	0.005197	0.003004	97.3215	4.48469	0.171379	431.085	1.4617	8.958
2008_05_10May\ 83015_8_1core.ais	83015	8	1	C	1384.66	46.3981	0.06931	0.00701	-0.208981	0.004269	0.002467	97.016	4.60596	0.162091	522.597	2.47144	8.968
2008_05_10May\ 83015_9_1core.ais	83015	9	2	C	1506.48	38.1272	0.05177	0.00244	0.114171	0.001865	0.0007328	99.2739	4.33885	0.109065	2977.64	2.66455	9.002
	sample	grain	spot	Core/Rim	238U/206Pb	1σ 238U/206Pb	207Pb/206Pb	1σ 207Pb/206Pb	Correlation of TW Concordia Ellipses	204Pb/206Pb	1σ 204Pb/206 Pb	% 206Pb*	206Pb/238U age [Ma]	1σ 206Pb/238U age [Ma]	U (ppm)	U/Th	UO/U	Comments
San Antonio	San Antonio
2011_08_23Aug\ B06005@1.ais	BOL06005	1	1	R	638.978	21.0271	0.07598	0.0071	-0.0306026	0.001997	0.001997	96.1933	9.7721	0.343978	159.269	1.51609	7.879
2011_08_23Aug\ B06005@2.ais	BOL06006	2	1	R	573.066	21.9374	0.07507	0.0124	0.137956	0.003734	0.002468	96.3162	10.9193	0.460737	177.684	3.41294	7.879
2011_08_23Aug\ B06005@3.ais	BOL06007	3	1	R	666.667	28.5333	0.0727	0.00576	-0.216544	0.002613	0.002302	96.6183	9.42162	0.421824	176.922	2.22988	7.974
2011_08_23Aug\ B06005@4.ais	BOL06008	4	1	R	663.57	21.664	0.06181	0.0054	-0.138004	0.004003	0.002079	98.0095	9.58095	0.324461	314.13	1.22265	7.863
2011_08_23Aug\ B06005@5.ais	BOL06009	5	1	R	520.562	15.419	0.2214	0.00911	0.21592	0.01515	0.003637	77.6025	9.69333	0.393109	306.714	2.80511	7.85	206Pb* <80%
2011_08_23Aug\ B06005@6.ais	BOL06010	6	1	R	634.518	18.6007	0.06753	0.00432	-0.0326122	0.002002	0.001455	97.2795	9.96905	0.303126	317.838	3.3326	8.019
2011_08_23Aug\ B06005@7.ais	BOL06011	7	1	R	581.058	13.6402	0.05576	0.00394	0.0369329	0.001934	0.0008654	98.7854	11.0203	0.265651	734.961	1.33094	8.005
2011_08_23Aug\ B06005@8.ais	BOL06012	8	1	R	675.676	21.366	0.08812	0.00916	-0.416228	0.005298	0.002559	94.6435	9.10714	0.325704	264.075	2.05638	8.038
2011_08_23Aug\ B06005@9.ais	BOL06013	9	1	R	90.4977	1.74444	0.05711	0.0013	-0.168275	0.0001617	8.398e-05	98.7572	70.0691	1.36802	916.435	9.46914	8.472
2011_08_23Aug\ B06005@11.ais	BOL06014	11	1	R	644.33	18.101	0.08459	0.00761	0.471247	n.d.	n.d.	95.0956	9.58783	0.292474	196.841	1.83048	8.138
2011_08_23Aug\ B06005@12.ais	BOL06015	12	1	R	591.366	16.2267	0.0509	0.00307	-0.0993631	0.0008059	0.0003834	99.41	10.934	0.302137	1597.02	21.2159	7.956
2011_08_23Aug\ B06005@13.ais	BOL06016	13	1	R	562.114	13.5552	0.04688	0.00212	-0.0603931	0.0004459	0.0002458	99.9209	11.5557	0.278151	2070.17	23.4982	7.937
2011_08_23Aug\ B06005@14.ais	BOL06017	14	1	R	634.921	19.9546	0.05814	0.00895	-0.0904331	0.003466	0.00165	98.4755	10.0798	0.338087	402.292	2.62346	7.906
2011_08_23Aug\ B06005@15.ais	BOL06018	15	1	R	609.756	14.0541	0.0473	0.00192	0.0113866	0.0008467	0.0004028	99.863	10.6483	0.244856	1614.11	5.32144	7.945
2011_08_23Aug\ B06005@16.ais	BOL06019	16	1	R	14.1383	0.331819	0.057	0.000419	0.0207413	n.d.	n.d.	99.8295	439.913	10.0195	648.446	3.20917	7.98
2011_08_23Aug\ B06005@17.ais	BOL06020	17	1	R	569.801	12.857	0.08479	0.00286	0.0314383	0.00418	0.0008202	95.076	10.8534	0.258906	1729.26	17.35	7.997
2011_08_23Aug\ B06005@18.ais	BOL06021	18	1	R	666.223	23.1691	0.06706	0.00542	-0.051058	0.002488	0.00176	97.3352	9.49436	0.343226	251.716	1.99467	8.019
2011_08_23Aug\ B06005@19.ais	BOL06022	19	1	R	668.896	17.181	0.06241	0.00747	0.0313579	0.005416	0.002497	97.9335	9.52376	0.262165	273.55	3.12533	8.086
2011_08_23Aug\ B06005@20.ais	BOL06023	20	1	R	127.389	32.7802	0.05222	0.00147	-0.0276427	0.0002346	0.0001795	99.3341	50.1738	12.9487	1340.97	7.39878	8.133
2011_08_23Aug\ B06005@21.ais	BOL06024	21	1	R	687.285	21.5869	0.06204	0.00725	-0.0486852	0.002952	0.001705	97.9813	9.27281	0.306406	319.486	2.61065	8.09
2011_08_23Aug\ B06005@22.ais	BOL06025	22	1	R	631.313	28.6961	0.06823	0.00866	0.254362	0.007863	0.003799	97.1885	9.98702	0.474623	172.143	1.35074	7.932
2011_08_23Aug\ B06005@23.ais	BOL06026	23	1	R	642.261	20.6662	0.0701	0.00646	0.374646	0.003081	0.001872	96.9475	9.78331	0.330471	277.258	1.05742	7.972
2011_08_23Aug\ B06005@24.ais	BOL06027	24	1	R	12.8205	0.302433	0.05659	0.000765	-0.0240213	n.d.	n.d.	100.028	484.378	11.0384	267.577	1.76411	8.047
2011_08_23Aug\ B06005@25.ais	BOL06028	25	1	R	609.385	17.342	0.0551	0.00347	0.0896301	0.001479	0.001046	98.8718	10.4821	0.304115	395.083	0.667917	8.051
2011_08_23Aug\ B06005@26.ais	BOL06029	26	1	R	586.166	19.8596	0.1661	0.012	-0.0567059	0.01909	0.006139	84.6778	9.38127	0.412975	144.747	1.54636	8.029
2011_08_23Aug\ B06005@27.ais	BOL06030	27	1	R	309.981	8.20596	0.05592	0.00154	0.229888	0.0004384	0.0002531	98.7884	20.6168	0.550461	1059.6	14.7184	7.929
2011_08_23Aug\ B06005@28.ais	BOL06031	28	1	R	681.199	23.712	0.07337	0.00553	-0.216325	0.004677	0.002702	96.5289	9.21537	0.337648	206.811	2.35215	8.119
2011_08_23Aug\ B06005@29.ais	BOL06032	29	1	R	654.45	18.6741	0.07975	0.00583	0.0531602	0.003832	0.002213	95.7145	9.50028	0.289802	260.985	1.73733	7.868
2011_08_23Aug\ B06005@30.ais	BOL06033	30	1	R	660.939	19.5704	0.1046	0.00542	-0.0825609	0.003239	0.001713	92.5417	9.09473	0.298284	330.197	1.52657	8.113
2011_08_23Aug\ B06005@31.ais	BOL06034	31	1	R	265.887	131.494	0.06192	0.00426	-0.0745269	0.0008603	0.0005227	98.0278	23.8151	11.9872	430.512	3.09272	9.029
	sample	grain	spot	Core/Rim	238U/206Pb	1σ 238U/206Pb	207Pb/206Pb	1σ 207Pb/206Pb	Correlation of TW Concordia Ellipses	204Pb/206Pb	1σ 204Pb/206 Pb	% 206Pb*	206Pb/238U age [Ma]	1σ 206Pb/238U age [Ma]	U (ppm)	U/Th	UO/U	Comments
Sifon	Sifon
2011_08_14Aug\ 83001_z@1.ais	83001	1	1	R	314.861	11.3017	0.5063	0.0133	-0.0535668	0.03701	0.004264	41.1459	8.50192	0.937001	342.684	2.01382	7.754	206Pb* <80%
2011_08_14Aug\ 83001_z@2.ais	83001	2	1	R	747.943	15.5518	0.07845	0.00492	0.142307	0.003532	0.001618	95.8783	8.35382	0.186113	552.997	3.82854	7.859
2011_08_14Aug\ 83001_z@3.ais	83001	3	1	C	679.81	17.5152	0.08822	0.00555	0.346974	0.002604	0.001504	94.6312	9.07033	0.250966	393.411	8.58543	7.816
2011_08_14Aug\ 83001_z@4.ais	83001	4	1	C	15.0648	0.755735	0.8043	0.00888	-0.0306689	0.06211	0.002512	3.05975	13.1598	30.7448	987.137	1.78953	6.723	206Pb* <80%
2011_08_14Aug\ 83001_z@5.ais	83001	5	1	R	469.484	10.2272	0.3523	0.0114	0.224949	0.02044	0.003069	60.847	8.44799	0.356388	506.528	4.95959	8.006	206Pb* <80%
2011_08_14Aug\ 83001_z@6.ais	83001	6	1	R	643.087	11.3729	0.2216	0.00981	-0.0394314	0.01723	0.003039	77.5797	7.86947	0.218975	565.771	4.46303	8.095	206Pb* <80%
2011_08_14Aug\ 83001_z@7.ais	83001	7	1	R	754.148	14.9578	0.0677	0.00345	0.027251	0.004387	0.001513	97.2498	8.40403	0.173419	692.588	4.14159	7.918
2011_08_14Aug\ 83001_z@8.ais	83001	8	1	C	697.837	13.9762	0.1048	0.00999	-0.0483039	0.003905	0.001698	92.5127	8.60882	0.217242	453.58	1.27738	8.02
2011_08_14Aug\ 83001_z@9.ais	83001	9	1	C	723.066	11.7635	0.05612	0.00234	0.156734	0.001122	0.0005172	98.7343	8.90224	0.147032	1434.79	15.4965	7.964
2011_08_14Aug\ 83001_z@10.ais	83001	10	1	C	757.576	13.028	0.0585	0.00314	-0.176938	0.00108	0.00054	98.426	8.47335	0.150396	1210.96	9.2763	8.259
2011_08_14Aug\ 83001_z@11.ais	83001	11	1	R	749.064	15.6546	0.07209	0.0047	0.297119	0.006162	0.002163	96.69	8.40196	0.185486	437.658	2.2729	8.001
2011_08_14Aug\ 83001_z@12.ais	83001	12	1	R	767.46	12.6045	0.05348	0.00241	0.0101686	0.0006997	0.000404	99.0706	8.41971	0.140154	1582.53	9.29429	8.097
2011_08_14Aug\ 83001_z@13.ais	83001	13	1	R	763.359	14.8593	0.06163	0.00364	-0.0197364	0.0008994	0.0005465	98.0218	8.37481	0.168751	939.002	7.76863	8.221
2011_08_14Aug\ 83001_z@14.ais	83001	14	1	R	708.215	13.1913	0.07318	0.00448	-0.169838	0.00249	0.0007068	96.5567	8.87189	0.177625	1799.51	2.58355	7.773
2011_08_14Aug\ 83001_z@15.ais	83001	15	1	R	619.963	29.9796	0.2416	0.0283	-0.613038	0.01454	0.002534	75.0051	7.87344	0.698627	732.392	1.73076	8.189	206Pb* <80%
2011_08_14Aug\ 83001_z@16.ais	83001	16	1	R	755.287	14.8319	0.05597	0.00288	0.169246	0.0004431	0.0003901	98.7499	8.50566	0.16998	1050.82	1.97784	7.935
2011_08_14Aug\ 83001_z@17.ais	83001	17	1	R	743.494	14.3724	0.06169	0.00307	0.127766	0.001037	0.0006715	98.0207	8.59642	0.170531	925.117	8.87449	7.896
2011_08_14Aug\ 83001_z@18.ais	83001	18	1	R	704.722	16.7862	0.07067	0.00442	0.24993	0.002277	0.001139	96.871	8.95569	0.222641	620.201	6.10264	7.769
2011_08_14Aug\ 83001_z@19.ais	83001	19	1	R	794.281	15.8352	0.06965	0.00544	0.386547	0.003085	0.001468	97.0016	7.95195	0.169007	519.673	2.07619	7.95
2011_08_14Aug\ 83001_z@20.ais	83001	21	1	R	807.754	16.5074	0.05279	0.00297	0.223053	0.001466	0.0007615	99.1548	8.00226	0.165266	1012.69	3.42434	7.788
2011_08_14Aug\ 83001_z@21.ais	83001	22	1	R	741.84	11.0065	0.05011	0.00145	-0.0425718	8.625e-05	8.627e-05	99.5018	8.73801	0.129914	3697.14	4.42585	8.304
2011_08_14Aug\ 83001_z@22.ais	83001	23	1	R	747.384	13.2384	0.05482	0.00281	0.308488	0.00115	0.0005144	98.8944	8.61995	0.155057	1484.41	3.87412	7.913
2011_08_14Aug\ 83001_z@23.ais	83001	24	1	C	539.374	25.165	0.2941	0.021	-0.491753	0.01336	0.002569	68.3088	8.25648	0.734142	473.204	4.5398	8.019	206Pb* <80%
2011_08_14Aug\ 83001_z@24.ais	83001	26	1	C	725.163	13.3569	0.05568	0.00308	0.477213	0.001258	0.0005629	98.7942	8.88125	0.166149	1426.65	12.27	7.879
2011_08_14Aug\ 83001_z@25.ais	83001	27	1	R	678.887	12.5361	0.05189	0.00189	-0.0409089	0.0006666	0.0003334	99.275	9.51985	0.176804	1979.09	5.75481	7.959
2011_08_14Aug\ 83001_z@26.ais	83001	28	1	C	673.401	20.8595	0.1024	0.00714	-0.220169	0.003073	0.002352	92.8202	8.9572	0.312102	148.774	1.6564	8.052
2011_08_14Aug\ 83001_z@27.ais	83001	29	1	C	723.066	13.1752	0.07565	0.00201	0.116733	0.001922	0.0005687	96.2394	8.6581	0.164012	1942.06	2.04621	7.997
2011_08_14Aug\ 83001_z@28.ais	83001	30	1	C	575.374	22.578	0.191	0.00764	-0.336131	0.007678	0.002967	81.4827	9.19787	0.477212	216.978	1.52926	7.944
2011_08_14Aug\ 83001_z@29.ais	83001	31	1	C	702.247	17.8028	0.07238	0.00627	0.0472915	0.002013	0.001253	96.6553	8.95524	0.243037	380.637	2.54876	7.974
2011_08_14Aug\ 83001_z@30.ais	83001	32	1	C	673.401	12.5157	0.05198	0.00166	0.0577681	0.0006333	0.0003288	99.2663	9.59727	0.178929	1757.48	6.95662	7.865
2011_08_14Aug\ 83001_z@31.ais	83001	33	1	R	765.111	14.5763	0.07054	0.00495	0.19326	0.001848	0.001414	96.8824	8.25237	0.16767	308.804	3.62704	7.938
2011_08_14Aug\ 83001_z@32.ais	83001	34	1	R	711.744	17.477	0.08461	0.00603	-0.260083	0.0035	0.001894	95.0906	8.69211	0.234622	303.435	2.18534	7.911
2011_08_14Aug\ 83001_z@33.ais	83001	35	1	R	745.712	14.6807	0.05692	0.00197	-0.16006	0.0009814	0.0005886	98.6334	8.62611	0.171869	1312.6	13.6254	7.862
2011_08_14Aug\ 83001_z@34.ais	83001	36	1	R	732.601	12.3979	0.05087	0.00199	0.0583731	0.0005905	0.0002953	99.4039	8.80456	0.150372	2095.72	1.14161	7.914
2011_08_14Aug\ 83001_z@35.ais	83001	37	1	C	723.066	12.9138	0.05258	0.00239	0.0402406	0.0003422	0.000242	99.1837	8.93876	0.161284	1912.44	7.58512	7.867
2011_08_14Aug\ 83001_z@36.ais	83001	38	1	C	727.802	14.8315	0.06154	0.00352	0.114148	0.003673	0.001324	98.0391	8.77186	0.184236	671.113	3.45073	7.864
2011_08_14Aug\ 83001_z@37.ais	83001	39	1	R	662.691	11.4181	0.1508	0.00617	-0.0946827	0.01333	0.002084	86.6176	8.52169	0.18605	1146.91	6.72634	7.858
2011_08_14Aug\ 83001_z@38.ais	83001	40	1	C	769.231	13.3136	0.05051	0.002	0.114488	0.0002413	0.0002414	99.45	8.41193	0.146356	1358.15	1.99703	7.974
2011_08_14Aug\ 83001_z@39.ais	83001	41	1	R	723.066	15.9461	0.07288	0.00534	-0.368401	0.001969	0.0009508	96.5882	8.69751	0.207357	663.337	3.05132	8.012
2011_08_14Aug\ 83001_z@40.ais	83001	42	1	C	722.543	13.2605	0.05628	0.00306	0.285159	0.0005275	0.000373	98.7127	8.90218	0.166486	1262.06	6.61839	7.783
2011_08_14Aug\ 83001_z@41.ais	83001	44	1	R	549.149	14.5354	0.28	0.00758	-0.0343222	0.01431	0.002988	70.1075	8.31847	0.346198	391.189	3.41354	7.969	206Pb* <80%
2011_08_14Aug\ 83001_z@42.ais	83001	46	1	R	728.863	12.2185	0.05621	0.00271	0.17533	0.0008873	0.0004608	98.724	8.82839	0.150808	1321.86	8.15004	7.947
2011_08_14Aug\ 83001_z@43.ais	83001	49	1	R	580.72	42.8289	0.1871	0.0368	-0.678671	0.01243	0.001928	81.9827	9.16059	1.05477	1086.37	1.21501	7.791
2011_08_14Aug\ 83001_z@44.ais	83001	50	1	C	647.668	10.9483	0.05016	0.00116	-0.0220538	0.001255	0.0004851	99.4972	10.0006	0.168888	2875.14	12.9177	7.76
2011_08_14Aug\ 83001_z@45.ais	83001	51	1	R	735.835	15.4314	0.091	0.00997	-0.46679	0.005717	0.002242	94.2733	8.35053	0.21735	651.859	4.24714	7.879
2011_08_14Aug\ 83001_z@46.ais	83001	52	1	R	679.81	12.4778	0.1513	0.00477	0.0784993	0.009675	0.00169	86.5665	8.28999	0.183874	1061.19	2.29089	7.75
2011_08_14Aug\ 83001_z@47.ais	83001	53	1	R	694.444	11.9599	0.05047	0.00131	0.107879	0.0005915	0.0002415	99.4573	9.32861	0.160472	3217.64	8.25919	7.827
2011_08_14Aug\ 83001_z@48.ais	83001	54	1	C	730.46	13.7128	0.05704	0.00362	-0.112958	0.002228	0.001027	98.6133	8.79724	0.170521	681.295	5.9659	7.842
2011_08_14Aug\ 83001_z@49.ais	83001	55	1	C	612.745	15.7316	0.2323	0.00799	-0.18397	0.01746	0.003572	76.2176	8.10458	0.304988	376.193	2.8822	7.728	206Pb* <80%
2011_08_14Aug\ 83001_z@50.ais	83001	56	1	R	716.846	13.823	0.05401	0.00267	0.107329	0.0008429	0.000377	99.009	9.00352	0.175676	1886.52	17.2596	7.775
2008_05_10May\ 84048_1_1core.ais	84048	1	1	C	748.503	17.536	0.06404	0.00412	-0.244463	1.481	0.0388	97.7019	8.48523	0.207553	580.431	1.37336	8.967
2008_05_10May\ 84048_19_1core.ais	84048	19	1	C	16.6196	0.309356	0.06159	0.000622	-0.101258	9.802e-05	3.466e-05	99.0187	373.146	6.84443	649.414	1.6846	9.312
2008_05_10May\ 84048_22_1core.ais	84048	22	1	C	735.294	16.5982	0.05138	0.00398	0.178109	0.0004869	0.0004871	99.3344	8.7912	0.201957	760.437	2.17252	8.839
2008_05_10May\ 84048_23_1core.ais	84048	23	1	C	715.308	20.2108	0.05785	0.00395	0.499321	0.001753	0.0009713	98.4962	8.95916	0.257064	684.951	2.21669	8.774
2008_05_10May\ 84048_3_1core.ais	84048	3	1	C	686.813	18.5855	0.05223	0.00133	-0.0365699	0.4635	0.007663	99.2302	9.38468	0.254637	4726.6	1.43705	8.949
2008_05_10May\ 84048_4_1core.ais	84048	4	2	C	686.342	15.2154	0.04944	0.00158	0.170271	0.2815	0.005274	99.5861	9.43573	0.20882	5567.4	2.24545	8.836
2008_05_10May\ 84048_5_1core.ais	84048	5	1	C	722.022	17.4119	0.055	0.00268	-0.0956886	0.5741	0.01512	98.8643	8.91619	0.217651	1305.1	3.29012	9.011
2008_05_10May\ 84048_6_1core.ais	84048	6	1	C	777.605	18.5029	0.06558	0.00386	-0.442485	1.079	0.02648	97.5111	8.17094	0.203122	815.484	2.68099	9.133
2008_05_10May\ 84048_6_2rim.ais	84048	6	1	R	710.227	15.3849	0.05589	0.00197	-0.082137	0.2929	0.006911	98.7549	9.05218	0.198129	2480.59	3.1802	8.967
2008_05_10May\ 84048_7_1core.ais	84048	7	1	C	690.608	31.3826	0.07956	0.00607	-0.15144	0.01454	0.008097	95.7037	9.01963	0.43239	347.469	2.71386	9.17
2008_05_10May\ 84048_8_1core.ais	84048	8	1	C	726.216	28.5846	0.09389	0.00669	0.000749453	0.003927	0.001757	93.8654	8.42046	0.35839	540.249	2.93162	9.087
2008_05_10May\ 84048_9_1core@1.ais	84048	9	1	C	742.39	30.4782	0.1184	0.00834	-0.393176	0.05592	0.01623	90.7118	7.95899	0.377407	258.047	2.04412	9.06
	sample	grain	spot	Core/Rim	238U/206Pb	1σ 238U/206Pb	207Pb/206Pb	1σ 207Pb/206Pb	Correlation of TW Concordia Ellipses	204Pb/206Pb	1σ 204Pb/206 Pb	% 206Pb*	206Pb/238U age [Ma]	1σ 206Pb/238U age [Ma]	U (ppm)	U/Th	UO/U	Comments
Tara	Tara
2011_08_15Aug\ BOL-06-013@1.ais	BOL-06-013	1	1	C	1774.31	65.1671	0.1337	0.0158	0.517296	0.008678	0.00479	88.8012	3.31846	0.146703	261.41	3.20665	7.802
2011_08_15Aug\ BOL-06-013@2.ais	BOL-06-013	2	1	C	1648.26	69.0058	0.1269	0.00985	0.0481746	0.01995	0.007342	89.6799	3.59666	0.171448	243.267	2.74216	7.748
2011_08_15Aug\ BOL-06-013@3.ais	BOL-06-013	3	1	C	1719.39	64.7434	0.1435	0.00998	-0.022903	0.02582	0.006689	87.5448	3.36182	0.150253	330.835	1.80714	7.828
2011_08_15Aug\ BOL-06-013@4.ais	BOL-06-013	4	1	R	1689.47	41.1023	0.1302	0.00824	0.244878	0.00856	0.003308	89.2429	3.49068	0.0998005	538.741	2.28373	7.649
2011_08_15Aug\ BOL-06-013@5.ais	BOL-06-013	5	1	C	1546.07	38.4845	0.1113	0.00938	0.150736	0.00901	0.003341	91.6665	3.90056	0.113796	541.704	1.75997	7.515
2011_08_15Aug\ BOL-06-013@6.ais	BOL-06-013	6	1	C	1567.15	74.4158	0.1463	0.0103	-0.0553152	0.01622	0.006481	87.194	3.66415	0.205236	236.972	1.69344	7.674
2011_08_15Aug\ BOL-06-013@7.ais	BOL-06-013	7	1	C	1719.1	36.9413	0.08352	0.00433	0.159896	0.004819	0.001958	95.2173	3.66757	0.0829172	1203.74	4.67511	7.66
2011_08_15Aug\ BOL-06-013@8.ais	BOL-06-013	7	2	R	1610.05	47.4382	0.09431	0.00562	-0.159336	0.01409	0.004126	93.8379	3.8519	0.122286	565.216	3.91064	7.629
2011_08_15Aug\ BOL-06-013@9.ais	BOL-06-013	8	1	C	1670.56	47.1643	0.1247	0.0168	0.108259	0.0209	0.006403	89.9406	3.55448	0.133565	348.053	2.13132	7.725
2011_08_15Aug\ BOL-06-013@10.ais	BOL-06-013	9	1	R	1543.45	48.1211	0.1472	0.014	0.255687	0.02243	0.007751	87.0762	3.71438	0.146756	236.047	1.69828	7.722
2011_08_15Aug\ BOL-06-013@11.ais	BOL-06-013	10	1	R	1731.3	43.1627	0.1059	0.00868	-0.0750362	0.008288	0.003565	92.3576	3.52717	0.101606	472.834	2.60548	7.715
2011_08_15Aug\ BOL-06-013@12.ais	BOL-06-013	11	1	R	646.831	14.4763	0.5529	0.0122	0.0273095	0.0392	0.005292	35.1835	3.59271	0.301444	397.669	2.36961	7.604	206Pb* <80%
2011_08_15Aug\ BOL-06-013@13.ais	BOL-06-013	12	1	R	1733.4	46.2721	0.126	0.0127	0.464948	0.01027	0.004469	89.7741	3.41921	0.111902	351.941	1.87488	7.892
2011_08_15Aug\ BOL-06-013@14.ais	BOL-06-013	13	1	C	1692.05	54.9701	0.1157	0.0102	-0.262627	0.01853	0.006148	91.1004	3.5549	0.135171	351.015	2.15793	7.706
2011_08_15Aug\ BOL-06-013@15.ais	BOL-06-013	14	1	R	1625.22	81.3536	0.152	0.0238	-0.348927	0.02146	0.008579	86.4554	3.52277	0.238495	242.526	3.53445	7.924
2011_08_15Aug\ BOL-06-013@16.ais	BOL-06-013	15	1	C	1693.48	49.3274	0.1136	0.0089	0.154033	0.002292	0.002293	91.3689	3.56687	0.118132	373.787	2.67926	7.711
2011_08_15Aug\ BOL-06-013@17.ais	BOL-06-013	16	1	R	1548.47	45.3175	0.1515	0.00946	0.000105608	0.01197	0.003792	86.5268	3.67285	0.132458	502.64	1.3862	7.942
2011_08_15Aug\ BOL-06-013@18_1.ais	BOL-06-013	17	1	R	73.046	2.26235	0.809	0.00719	-0.0299385	0.05451	0.003247	2.40301	2.19416	3.96306	246.414	1.46966	7.76	206Pb* <80%
2011_08_15Aug\ BOL-06-013@19.ais	BOL-06-013	18	1	R	1495.44	38.9123	0.1984	0.0118	-0.0834582	0.01621	0.00533	80.534	3.56448	0.131611	353.607	3.39051	7.663
2011_08_15Aug\ BOL-06-013@20.ais	BOL-06-013	19	1	C	1652.07	42.3049	0.09302	0.00896	-0.226438	0.01065	0.003772	94.0039	3.76145	0.109956	507.454	3.53566	7.71
2011_08_15Aug\ BOL-06-013@21.ais	BOL-06-013	20	1	R	1687.48	43.5681	0.08387	0.00556	-0.391867	0.006279	0.003262	95.1729	3.72585	0.103537	422.662	2.88611	7.751
2011_08_15Aug\ BOL-06-013@22.ais	BOL-06-013	21	1	R	1708.82	63.9493	0.1153	0.0111	0.110016	0.02841	0.008595	91.1485	3.52039	0.15023	261.04	1.97044	7.894
2011_08_15Aug\ BOL-06-013@23.ais	BOL-06-013	22	1	C	1774.31	48.7966	0.08985	0.00718	0.484951	0.01405	0.004452	94.4084	3.50237	0.103709	476.351	1.44668	7.781
2011_08_15Aug\ BOL-06-013@24.ais	BOL-06-013	23	1	R	1726.52	58.425	0.1179	0.0125	0.129796	0.005441	0.00385	90.8276	3.47679	0.138393	256.041	2.28373	7.658
2011_08_15Aug\ BOL-06-013@25.ais	BOL-06-013	24	1	C	1705.32	41.2953	0.08287	0.00788	0.126856	0.006877	0.003573	95.3014	3.6962	0.0982085	356.939	3.58526	7.682
2011_08_15Aug\ BOL-06-013@26.ais	BOL-06-013	25	1	R	1731.9	55.7904	0.09552	0.0097	0.69362	0.001826	0.001826	93.6842	3.57484	0.125238	319.727	2.54258	7.824
2011_08_15Aug\ BOL-06-013@27.ais	BOL-06-013	26	1	R	1607.98	41.6279	0.08282	0.00572	0.37451	0.00801	0.002912	95.3087	3.91709	0.106815	552.071	4.37875	7.771
2011_08_15Aug\ BOL-06-013@28.ais	BOL-06-013	27	1	C	912.409	73.8418	0.432	0.029	-0.243197	0.04016	0.009023	50.6507	3.67454	0.745473	280.294	4.25416	7.955	206Pb* <80%
2011_08_15Aug\ BOL-06-013@29.ais	BOL-06-013	28	1	R	1668.61	57.6344	0.1111	0.0112	0.39837	0.0159	0.006353	91.6953	3.63446	0.141679	257.337	3.20544	7.92
2011_08_15Aug\ BOL-06-013@30.ais	BOL-06-013	29	1	R	1583.53	41.6257	0.1986	0.0131	0.15646	0.02695	0.006615	80.508	3.35891	0.12488	379.896	1.93778	7.928
2011_08_15Aug\ BOL-06-013@31.ais	BOL-06-013	30	1	R	1420.66	36.9342	0.07736	0.0056	-0.107095	0.009014	0.003597	96.0059	4.44304	0.122592	398.965	2.47242	7.867
2011_08_15Aug\ BOL-06-013@32.ais	BOL-06-013	30	2	C	1013.58	24.3482	0.06815	0.00516	0.503268	0.003327	0.001728	97.1886	6.2688	0.156624	444.138	2.79781	7.847
2011_08_15Aug\ BOL-06-013@33.ais	BOL-06-013	31	1	R	1354.28	51.9043	0.3127	0.0241	-0.092445	0.04411	0.008873	65.9123	3.22123	0.242801	324.726	2.11196	7.735	206Pb* <80%
2011_08_15Aug\ BOL-06-013@34.ais	BOL-06-013	32	1	R	1888.57	74.5443	0.05854	0.00313	-0.21686	0.004314	0.001526	98.4106	3.45446	0.135909	1412.95	4.0195	7.936
2011_08_15Aug\ BOL-06-013@35.ais	BOL-06-013	33	1	R	1247.19	109.196	0.2815	0.0254	-0.389596	0.04958	0.00909	69.9188	3.7069	0.54051	412.85	3.43043	7.445	206Pb* <80%
2011_08_15Aug\ BOL-06-013@36.ais	BOL-06-013	34	1	C	1614.73	34.1562	0.08676	0.00475	-0.0281324	0.00327	0.001127	94.8045	3.8783	0.087928	1629.74	3.5659	7.83
2011_08_15Aug\ BOL-06-013@37.ais	BOL-06-013	35	1	R	1752.54	70.3351	0.09557	0.00865	0.215951	0.01471	0.005745	93.6768	3.53285	0.152332	291.402	2.46154	7.916
2011_08_15Aug\ BOL-06-013@38.ais	BOL-06-013	36	1	R	1751.01	52.429	0.1002	0.0106	0.442955	0.01018	0.003852	93.0802	3.50944	0.118246	459.504	2.03092	7.817
2011_08_15Aug\ BOL-06-013@39.ais	BOL-06-013	37	1	R	1896.09	79.8128	0.08388	0.00947	0.166176	0.02281	0.008087	95.1702	3.32099	0.14819	400.816	2.26074	7.326
2011_08_15Aug\ BOL-06-013@40.ais	BOL-06-013	38	1	R	1599.23	51.1509	0.1376	0.0116	0.458499	0.01931	0.00697	88.3088	3.64136	0.138258	239.194	1.96197	7.788
2011_08_15Aug\ BOL-06-013@41.ais	BOL-06-013	39	1	R	1771.17	64.6228	0.09939	0.00882	0.419879	0.02443	0.006721	93.1871	3.47683	0.137244	330.835	2.24865	7.965
2011_08_15Aug\ BOL-06-013@42.ais	BOL-06-013	40	1	R	911.577	43.3768	0.4472	0.0317	-0.440545	0.01973	0.004857	48.7231	3.53782	0.539254	313.433	3.25503	7.686	206Pb* <80%
2011_08_15Aug\ BOL-06-013@43.ais	BOL-06-013	41	1	R	1818.84	49.292	0.07564	0.00597	0.254436	0.005971	0.002791	96.2248	3.49215	0.0990905	555.218	1.95834	7.938
2011_08_15Aug\ BOL-06-013@44.ais	BOL-06-013	42	1	R	1858.39	78.0517	0.0954	0.0112	0.64841	0.01693	0.006416	93.6983	3.33544	0.150737	375.823	2.24865	7.385
2011_08_15Aug\ BOL-06-013@45.ais	BOL-06-013	43	1	R	1678.98	31.5725	0.06008	0.00231	-0.0542793	0.002264	0.0007675	98.2147	3.86403	0.0731756	2467.84	3.4776	7.772
2011_08_15Aug\ BOL-06-013@46.ais	BOL-06-013	44	1	C	1720.87	59.5243	0.1151	0.0125	0.39032	0.00347	0.003471	91.1833	3.49782	0.139603	216.422	1.98616	7.751
2011_08_15Aug\ BOL-06-013@47.ais	BOL-06-013	45	1	R	1685.77	39.7856	0.06984	0.00516	0.250448	0.002939	0.001621	96.9658	3.79911	0.0930657	739.427	3.06513	7.691
2011_08_15Aug\ BOL-06-013@48.ais	BOL-06-013	45	2	C	1631.06	65.1784	0.1086	0.0107	0.417521	0.007196	0.004158	92.0121	3.72136	0.164404	369.899	2.22566	7.288
2011_08_15Aug\ BOL-06-013@49.ais	BOL-06-013	46	1	R	1585.04	41.9561	0.1718	0.0116	0.0372422	0.01571	0.005487	83.9379	3.48897	0.123185	351.941	1.57127	7.71
2011_08_15Aug\ BOL-06-013@50.ais	BOL-06-013	47	1	C	643.087	15.3845	0.5436	0.0115	0.00340377	0.03572	0.005219	36.3681	3.73159	0.317311	332.872	2.34904	7.827	206Pb* <80%
	sample	grain	spot	Core/Rim	238U/206Pb	1σ 238U/206Pb	207Pb/206Pb	1σ 207Pb/206Pb	Correlation of TW Concordia Ellipses	204Pb/206Pb	1σ 204Pb/206 Pb	% 206Pb*	206Pb/238U age [Ma]	1σ 206Pb/238U age [Ma]	U (ppm)	U/Th	UO/U	Comments
Toconao	Toconao
2011_08_19Aug\ 88052B@1.ais	88052B	2	1	R	687.285	22.8623	0.06377	0.00702	0.0925362	0.0007721	0.0007722	97.7582	9.25611	0.321691	352.496	3.31102	7.742
2011_08_19Aug\ 88052B@2.ais	88052B	4	1	R	1049.98	42.0036	0.07639	0.00505	-0.0198641	0.001003	0.001003	96.136	5.98862	0.249285	435.807	2.58212	7.467
2011_08_19Aug\ 88052B@3.ais	88052B	5	1	R	1399.19	50.9009	0.06231	0.00517	0.0549876	0.001461	0.0006731	97.9319	4.60883	0.170232	1942.06	4.86504	7.559
2011_08_19Aug\ 88052B@4.ais	88052B	8	1	R	1378.55	51.8809	0.06163	0.00334	0.110011	0.00147	0.0008487	98.0176	4.68154	0.177133	1218.19	5.48058	7.484
2011_08_19Aug\ 88052B@5.ais	88052B	11	1	C	267.881	19.7341	0.6753	0.00868	-0.0751932	0.03053	0.002649	19.5812	4.80673	2.39272	652.784	4.06364	7.418	206Pb* <80%
2011_08_19Aug\ 88052B@6.ais	88052B	14	1	R	1404.49	47.737	0.07834	0.00437	0.0229709	0.001232	0.0008713	95.8828	4.49255	0.158356	918.452	3.25698	7.655
2011_08_19Aug\ 88052B@7.ais	88052B	19	1	C	1480.6	52.6125	0.09154	0.00677	-0.0221317	0.003362	0.002222	94.1944	4.18983	0.159613	378.97	2.71525	7.941
2011_08_19Aug\ 88052B@8.ais	88052B	19	2	R	1138.17	47.4131	0.1651	0.00941	0.0536417	0.01157	0.002331	84.791	4.89783	0.247777	1115.81	4.36021	7.341
2011_08_19Aug\ 88052B@9.ais	88052B	22	1	R	1445.92	77.1465	0.1997	0.0273	-0.56054	0.009121	0.003525	80.3685	3.669	0.306458	383.043	2.33564	8.015
2011_08_19Aug\ 88052B@10.ais	88052B	26	1	R	1357.96	61.7756	0.07607	0.00529	0.0677285	0.003558	0.002055	96.171	4.65186	0.218537	435.992	2.4714	7.545
2011_08_19Aug\ 88052B@12.ais	88052B	30	2	M	1062.36	43.3386	0.06515	0.00723	-0.0096802	0.0008884	0.001055	97.5715	6.01614	0.253583	342.314	4.76882	7.672
2011_08_19Aug\ 88052B@13.ais	88052B	30	3	R	970.874	35.9129	0.05019	0.00182	0.0195493	n.d.	n.d.	99.4888	6.70085	0.246198	2208.65	4.84526	7.494
2011_08_19Aug\ 88052B@11.ais	88052B	30	1	C	10.5419	0.445634	0.06103	0.000515	0.0170984	n.d.	n.d.	99.7928	583.121	23.6773	478.388	1.29185	7.35
2011_08_19Aug\ 88052B@14.ais	88052B	32	1	R	1336.01	52.8333	0.07527	0.00709	0.350655	0.004148	0.002396	96.2739	4.73036	0.194492	407.296	2.31455	7.488
2011_08_19Aug\ 88052B@15.ais	88052B	33	1	R	1303.78	54.565	0.06919	0.00483	-0.117768	n.d.	n.d.	97.0528	4.89451	0.209835	810.704	4.51706	7.41
2011_08_19Aug\ 88052B@16.ais	88052B	34	1	R	1416.63	64.0183	0.07468	0.00704	-0.278721	0.003742	0.002161	96.3492	4.47823	0.211129	449.507	3.76444	7.592
2011_08_19Aug\ 88052B@17.ais	88052B	36	1	R	970.874	54.2935	0.3534	0.0195	0.00126569	0.01622	0.007268	60.6959	4.10957	0.431819	118.653	1.8295	7.572	206Pb* <80%
2011_08_19Aug\ 88052B@28.ais	88052B	36	2	C	1384.27	64.5765	0.1371	0.0112	-0.264892	0.002898	0.002898	88.3763	4.18588	0.232413	176.97	1.38398	7.763
2011_08_19Aug\ 88052B@19.ais	88052B	38	2	R	1455.6	56.5715	0.06434	0.00375	-0.0101739	0.0007358	0.000736	97.671	4.40207	0.173684	807.187	1.66737	7.532
2011_08_19Aug\ 88052B@18.ais	88052B	38	1	C	1456.88	54.3357	0.0551	0.00506	0.111672	0.001115	0.001115	98.8527	4.45084	0.167224	668.706	1.68319	7.812
2011_08_19Aug\ 88052B@20.ais	88052B	39	1	C	1192.89	36.9977	0.06034	0.00663	0.307075	0.0007319	0.0007319	98.1847	5.38287	0.172393	532.077	1.73196	8.105
2011_08_19Aug\ 88052B@23.ais	88052B	43	1	R	1413.63	50.7579	0.06623	0.00562	0.012062	0.001727	0.001222	97.4314	4.53264	0.166956	642.417	2.88396	7.527
2011_08_19Aug\ 88052B@24.ais	88052B	44	1	R	683.06	26.1746	0.05699	0.00554	0.00631975	0.001455	0.0009618	98.6258	9.38839	0.367322	436.362	2.38177	7.471
2011_08_19Aug\ 88052B@26.ais	88052B	46	1	C	1469.72	57.0263	0.08823	0.00725	-0.0224533	0.005286	0.003055	94.6158	4.2402	0.175329	326.022	2.95514	7.595
2011_08_19Aug\ 88052B@27.ais	88052B	48	1	C	1328.55	51.3629	0.104	0.0059	0.0071613	0.0006827	0.0008971	92.5933	4.57918	0.191957	420.07	2.44899	7.564
	sample	grain	spot	Core/Rim	238U/206Pb	1σ 238U/206Pb	207Pb/206Pb	1σ 207Pb/206Pb	Correlation of TW Concordia Ellipses	204Pb/206Pb	1σ 204Pb/206 Pb	% 206Pb*	206Pb/238U age [Ma]	1σ 206Pb/238U age [Ma]	U (ppm)	U/Th	UO/U	Comments
Toconce	Toconce
2010_12_22Dec\ 09033GG_z_r@1.ais	9033GG	1	1	R	898.473	22.1187	0.09308	0.00694	-0.144064	0.003763	0.002173	94.0062	6.83439	0.188425	672.078	3.24895	8.348
2010_12_22Dec\ 09033GG_z_r@10.ais	9033GG	10	1	R	935.454	24.8521	0.09308	0.0103	0.287714	0.005374	0.002688	94.0017	6.57169	0.200125	579.892	4.32727	8.37
2010_12_22Dec\ 09033GG_z_r@11.ais	9033GG	11	1	R	886.525	23.1062	0.07763	0.0101	-0.0444913	0.002981	0.002108	95.9735	7.06249	0.209949	514.477	2.40495	8.333
2010_12_22Dec\ 09033GG_z_r@12.ais	9033GG	12	1	R	996.016	27.2813	0.08365	0.0085	0.22217	0.006216	0.00311	95.2069	6.25462	0.188464	565.495	3.84349	8.346
2010_12_22Dec\ 09033GG_z_r@13.ais	9033GG	13	1	R	843.882	16.4504	0.1781	0.00484	0.0338316	0.01101	0.001856	83.1311	6.4223	0.15802	2568.6	1.5248	8.382
2010_12_22Dec\ 09033GG_z_r@14.ais	9033GG	14	1	R	900.09	24.953	0.08542	0.0124	0.155162	0.003777	0.002181	94.9865	6.9015	0.224309	599.592	7.52959	8.184
2010_12_22Dec\ 09033GG_z_r@15.ais	9033GG	15	1	R	936.33	31.6493	0.09934	0.0108	0.0136152	0.003495	0.00254	93.2089	6.50679	0.250398	452.093	3.17901	8.314
2010_12_22Dec\ 09033GG_z_r@16.ais	9033GG	16	1	R	853.242	24.68	0.08964	0.0077	-0.252886	0.009275	0.004278	94.4399	7.22181	0.232528	400.065	2.81529	8.366
2010_12_22Dec\ 09033GG_z_r@17.ais	9033GG	17	1	R	958.773	29.3239	0.1354	0.0142	0.0708049	0.01006	0.004378	88.6006	6.04621	0.236482	471.288	3.00298	8.394
2010_12_22Dec\ 09033GG_z_r@18.ais	9033GG	18	1	R	944.287	22.3811	0.08982	0.00545	0.091168	0.002424	0.0014	94.4233	6.53631	0.168107	1069.11	3.32706	8.473
2010_12_22Dec\ 09033GG_z_r@19.ais	9033GG	19	1	R	993.049	23.273	0.05654	0.00491	-0.0676762	0.003724	0.001823	98.6769	6.49854	0.157232	2030.63	3.9892	8.352
2010_12_22Dec\ 09033GG_z_r@2.ais	9033GG	2	1	R	882.613	27.0315	0.07436	0.00786	-0.0552925	0.002832	0.002082	96.394	7.13117	0.235016	593.278	3.58585	8.266
2010_12_22Dec\ 09033GG_z_r@20.ais	9033GG	20	1	R	982.318	22.1938	0.04954	0.00409	-0.068648	n.d.	n.d.	99.5678	6.62697	0.151971	2561.02	4.02534	8.394
2010_12_22Dec\ 09033GG_z_r@3.ais	9033GG	3	1	R	524.384	10.9441	0.409	0.0144	0.001251	0.02539	0.004811	53.6302	6.68512	0.355615	537.966	3.83882	8.388	206Pb* <80%
2010_12_22Dec\ 09033GG_z_r@4.ais	9033GG	4	1	R	840.336	18.3603	0.07501	0.00608	0.0667543	0.002466	0.001281	96.3127	7.4744	0.176717	1155.49	2.7605	8.253
2010_12_22Dec\ 09033GG_z_r@5.ais	9033GG	5	1	R	945.18	23.0488	0.08844	0.0089	0.0159831	0.005917	0.002858	94.5965	6.54353	0.182096	605.401	3.68145	8.433
2010_12_22Dec\ 09033GG_z_r@6.ais	9033GG	6	1	R	848.896	16.142	0.05358	0.00171	-0.20333	0.000521	0.0002705	99.0531	7.62057	0.14565	5248.32	8.5403	8.421
2010_12_22Dec\ 09033GG_z_r@7.ais	9033GG	7	1	R	856.164	25.3624	0.08607	0.0121	-0.115808	0.005003	0.003539	94.9008	7.22891	0.250145	307.626	2.39446	8.242
2010_12_22Dec\ 09033GG_z_r@8.ais	9033GG	8	1	R	843.882	16.664	0.1438	0.00452	0.0880102	0.006218	0.001391	87.5218	6.76344	0.157652	2331.94	1.85588	8.308
2010_12_22Dec\ 09033GG_z_r@9.ais	9033GG	9	1	R	949.668	19.8411	0.05963	0.00421	-0.060376	0.0009157	0.0008058	98.279	6.76017	0.146266	1134.78	3.10673	8.333
	sample	grain	spot	Core/Rim	238U/206Pb	1σ 238U/206Pb	207Pb/206Pb	1σ 207Pb/206Pb	Correlation of TW Concordia Ellipses	204Pb/206Pb	1σ 204Pb/206 Pb	% 206Pb*	206Pb/238U age [Ma]	1σ 206Pb/238U age [Ma]	U (ppm)	U/Th	UO/U	Comments
Vilama	Vilama
2011_08_22Aug\ BOL06042@1.ais	BOL06042	1	1	R	715.308	25.3274	0.06514	0.00911	-0.191987	0.003445	0.001723	97.5775	8.88143	0.335961	338.23	3.37228	8.251
2011_08_22Aug\ BOL06042@2.ais	BOL06042	2	1	R	575.705	25.4212	0.1789	0.00841	-0.250825	0.008315	0.001485	83.0386	9.39441	0.52837	1124.48	8.497	7.756
2011_08_22Aug\ BOL06042@3.ais	BOL06042	3	1	R	726.216	32.6455	0.065	0.00419	-0.110051	0.0985	0.009463	97.5983	8.74511	0.402732	407.442	2.39827	7.974
2011_08_22Aug\ BOL06042@4.ais	BOL06042	4	1	R	698.324	27.8939	0.05668	0.00398	0.0231021	0.001623	0.0007585	98.6633	9.19326	0.371596	975.554	3.01392	7.702
2011_08_22Aug\ BOL06042@5.ais	BOL06042	5	1	R	738.552	27.7639	0.05101	0.00301	-0.119889	0.001929	0.0006434	99.3844	8.76631	0.330133	1497.94	4.46444	8.047
2011_08_22Aug\ BOL06042@6.ais	BOL06042	6	1	R	762.777	24.9022	0.07485	0.00475	-0.00544606	0.001708	0.001038	96.3369	8.23258	0.280842	496.016	3.99056	8.267
2011_08_22Aug\ BOL06042@7.ais	BOL06042	7	1	R	796.813	31.3646	0.05172	0.00289	0.0284912	0.001396	0.0006983	99.2916	8.12164	0.319827	888.421	3.38016	8.313
2011_08_22Aug\ BOL06042@8.ais	BOL06042	8	1	R	776.398	30.9836	0.0561	0.00276	-0.0666213	0.002858	0.001019	98.735	8.27251	0.333002	914.581	1.77212	8.038
2011_08_22Aug\ BOL06042@9.ais	BOL06042	9	1	R	703.73	28.6741	0.05618	0.0038	0.0692962	0.002035	0.0008517	98.7245	9.1394	0.37564	876.268	7.60963	7.916
2011_08_22Aug\ BOL06042@10.ais	BOL06042	10	1	R	761.035	27.2212	0.05544	0.00284	-0.0399615	0.001488	0.0006954	98.8153	8.46953	0.304738	959.075	12.0019	8.097
2011_08_22Aug\ BOL06042@11.ais	BOL06042	11	1	R	710.732	28.9445	0.06062	0.00333	-0.0239189	0.001274	0.0009009	98.1583	8.9944	0.371704	472.946	4.48938	7.924
2011_08_22Aug\ BOL06042@12.ais	BOL06042	12	1	R	723.066	27.2914	0.05255	0.00175	-0.115419	0.001394	0.0004407	99.1904	8.93575	0.337497	2222.6	4.96719	8.022
2011_08_22Aug\ BOL06042@13.ais	BOL06042	13	1	R	714.286	27.0408	0.05907	0.00363	0.0278539	0.002699	0.001304	98.358	8.95965	0.344185	471.092	2.58467	7.941
2011_08_22Aug\ BOL06042@14.ais	BOL06042	14	1	R	705.219	29.7903	0.08811	0.00519	-0.0938865	0.006421	0.002032	94.6471	8.74263	0.392752	456.261	4.2124	8.066
2011_08_22Aug\ BOL06042@15.ais	BOL06042	15	1	R	707.214	25.7078	0.04733	0.00138	-0.0103415	0.0005294	0.0002044	99.8584	9.2012	0.33177	3658.33	13.8751	8.186
2011_08_22Aug\ BOL06042@16.ais	BOL06042	16	1	R	725.163	26.6612	0.06216	0.00403	0.113368	0.004021	0.001404	97.9601	8.78419	0.329662	669.457	1.9047	7.843
2011_08_22Aug\ BOL06042@17.ais	BOL06042	17	1	R	734.214	28.1395	0.05274	0.0021	-0.116769	0.001003	0.0004625	99.1627	8.80338	0.337736	1491.34	8.24496	7.921
2011_08_22Aug\ BOL06042@18.ais	BOL06042	18	1	R	707.214	25.7578	0.05254	0.00222	-0.0848121	0.0005731	0.0003788	99.1873	9.13573	0.333281	1137.46	6.3862	8.131
2011_08_22Aug\ BOL06042@19.ais	BOL06042	19	1	R	735.835	28.5887	0.06415	0.00564	0.177488	0.003331	0.001666	97.7063	8.65414	0.345162	381.694	5.79025	7.954
2011_08_22Aug\ BOL06042@20.ais	BOL06042	20	1	R	670.241	24.5725	0.04966	0.00227	-0.132004	0.0005695	0.0002727	99.5587	9.67591	0.354019	2852.92	31.9901	8.285
2011_08_22Aug\ BOL06042@21.ais	BOL06042	21	1	R	742.942	28.3709	0.05747	0.00372	0.0756247	0.001733	0.001053	98.5572	8.64169	0.333691	500.754	3.8816	7.994
2011_08_22Aug\ BOL06042@22.ais	BOL06042	22	1	R	710.732	27.3786	0.05223	0.00254	0.0511898	0.0005679	0.0004108	99.2329	9.09682	0.35055	1017.78	8.02312	7.858
2011_08_22Aug\ BOL06042@23.ais	BOL06042	23	1	R	715.82	26.491	0.05325	0.00251	-0.000853246	0.0007585	0.0004381	99.0986	9.02117	0.334602	1171.04	8.4143	8.072
2011_08_22Aug\ BOL06042@24.ais	BOL06042	24	1	R	738.552	27.1639	0.0512	0.00181	0.0329587	0.0006568	0.0003284	99.3611	8.7702	0.321693	1841.32	9.10477	8.149
2011_08_22Aug\ BOL06042@25.ais	BOL06042	25	1	R	714.286	26.2755	0.05308	0.00192	-0.047235	0.0003622	0.0002562	99.1265	9.04068	0.332958	1667.26	6.24443	7.971
2011_08_22Aug\ BOL06042@26.ais	BOL06042	26	1	R	722.022	29.8714	0.05264	0.00171	-0.0509064	0.0007762	0.0003578	99.1733	8.94754	0.370185	1836.99	5.23761	7.957
2011_08_22Aug\ BOL06042@27.ais	BOL06042	27	1	R	730.994	27.7863	0.05621	0.00237	0.0575174	0.001682	0.0007525	98.7232	8.8005	0.336302	935.18	5.91626	7.902
2011_08_22Aug\ BOL06042@28.ais	BOL06042	28	1	R	668.449	25.1115	0.05221	0.00129	0.0573157	n.d.	n.d.	99.2347	9.66659	0.362644	1999.1	9.63641	7.954
2011_08_22Aug\ BOL06042@29.ais	BOL06042	29	1	R	735.835	28.1556	0.04716	0.00198	0.0146829	0.001172	0.0004785	99.8774	8.84572	0.33591	1526.98	7.08193	8.011
2011_08_22Aug\ BOL06042@30.ais	BOL06042	30	1	R	757.576	27.95	0.05486	0.00257	-0.195711	0.0008024	0.0004996	98.8919	8.51315	0.315856	989.561	9.6351	7.95
2011_08_22Aug\ BOL06042@31.ais	BOL06042	31	1	R	743.494	33.9409	0.07448	0.00677	0.0466649	0.002564	0.001657	96.3794	8.44722	0.402676	313.512	4.0155	8.02
2011_08_22Aug\ BOL06042@32.ais	BOL06042	32	1	R	698.812	29.0561	0.07933	0.00941	-0.388434	0.002883	0.0009653	95.7672	8.91812	0.403233	1200.08	2.69888	8.027
	sample	grain	spot	Core/Rim	238U/206Pb	1σ 238U/206Pb	207Pb/206Pb	1σ 207Pb/206Pb	Correlation of TW Concordia Ellipses	204Pb/206Pb	1σ 204Pb/206 Pb	% 206Pb*	206Pb/238U age [Ma]	1σ 206Pb/238U age [Ma]	U (ppm)	U/Th	UO/U	Comments
Purico	Purico
2012_3_19Mar\ PURICO@1.ais	83043	1	1	R	4440.5	222.814	0.1015	0.0136	0.288638	0.01686	0.007557	92.9125	1.43899	0.0762709	1007	2.75207	8.427
2012_3_19Mar\ PURICO@10.ais	83043	10	1	R	2563.45	153.767	0.3646	0.0426	0.0941627	0.04023	0.01452	59.2813	1.58244	0.204376	415.991	2.99756	8.609	206Pb* <80%
2012_3_19Mar\ PURICO@11.ais	83043	11	1	R	2155.64	160.314	0.4917	0.0303	-0.181476	0.0331	0.009596	43.0316	1.38409	0.29994	510.359	4.40001	8.656	206Pb* <80%
2012_3_19Mar\ PURICO@12.ais	83043	12	1	R	4574.57	238.564	0.2547	0.0245	0.0137527	0.02937	0.00946	73.3318	1.11661	0.0870675	1115.81	2.00901	8.45	206Pb* <80%
2012_3_19Mar\ PURICO@13.ais	83043	13	1	R	5633.8	330.093	0.1578	0.018	-0.275577	0.01301	0.009698	85.7156	1.07056	0.0741906	891.924	2.68712	8.664
2012_3_19Mar\ PURICO@14.ais	83043	14	1	R	170.242	13.5927	0.8044	0.0123	0.0597925	0.05351	0.00395	3.06945	1.25371	4.06989	697.891	2.94472	8.245	206Pb* <80%
2012_3_19Mar\ PURICO@15.ais	83043	15	1	R	3640.33	155.049	0.09235	0.0109	0.169656	0.01101	0.004131	94.0838	1.74227	0.0788627	1538.06	1.58629	8.705
2012_3_19Mar\ PURICO@16.ais	83043	16	1	R	3334.44	165.666	0.1397	0.025	-0.0148229	0.01408	0.006878	88.0363	1.79458	0.113525	838.24	3.17699	8.562
2012_3_19Mar\ PURICO@17.ais	83043	17	1	R	3786.44	156.275	0.07368	0.0151	0.145486	0.003537	0.002707	96.4747	1.73341	0.0765618	1280.95	2.88197	8.648
2012_3_19Mar\ PURICO@18.ais	83043	18	1	R	3937.01	193.75	0.1001	0.0131	0.334395	0.005076	0.003592	93.0885	1.6132	0.08414	1090.05	2.59685	8.475
2012_3_19Mar\ PURICO@19.ais	83043	19	1	R	5268.7	288.696	0.1329	0.015	0.0757214	0	0	88.8941	1.17908	0.0710483	922.497	2.94362	8.507
2012_3_19Mar\ PURICO@2.ais	83043	2	1	R	5274.26	328.25	0.1094	0.021	-0.0606801	0.005047	0.005052	91.8984	1.21142	0.0829385	773.964	2.48897	8.432
2012_3_19Mar\ PURICO@20.ais	83043	20	1	R	3977.72	178.792	0.06794	0.00925	0.127097	0.006232	0.0036	97.2049	1.66165	0.0750583	1328.86	2.29303	8.586
2012_3_19Mar\ PURICO@3.ais	83043	3	1	R	4945.6	249.481	0.07536	0.00859	-0.170916	0	0	96.2509	1.33556	0.0676156	1232.08	1.84939	8.408
2012_3_19Mar\ PURICO@4.ais	83043	4	1	R	4757.37	239.906	0.06554	0.00794	-0.0559585	0.005782	0.004092	97.5133	1.40517	0.0697982	1221.73	2.06075	8.487
2012_3_19Mar\ PURICO@5.ais	83043	5	1	R	2548.42	112.354	0.06058	0.00475	-0.0577107	0	0	98.1471	2.56699	0.112775	1509.41	2.1301	8.572
2012_3_19Mar\ PURICO@6.ais	83043	6	1	R	6075.33	311.518	0.09532	0.0107	0.034912	0.003285	0.003287	93.6993	1.0758	0.056363	1466.32	1.88792	8.458
2012_3_19Mar\ PURICO@7.ais	83043	7	1	R	4498.43	250.924	0.1779	0.0145	-0.094029	0.004144	0.004145	83.1457	1.28556	0.0861374	861.591	3.461	8.438
2012_3_19Mar\ PURICO@8.ais	83043	8	1	R	4746.08	250.031	0.1456	0.0172	-0.236945	0.002889	0.002888	87.2666	1.27065	0.0792018	1158.18	2.19065	8.538
2012_3_19Mar\ PURICO@9.ais	83043	9	1	R	2489.42	110.93	0.07296	0.00856	-0.0170839	n.d.	n.d.	96.5653	2.58108	0.11885	1406.13	1.84389	8.467
2008_05_10May\ 84083_01_1@1.ais	84083	1	1	R	5149.33	360.612	0.1881	0.0212	-0.153984	4.66	0.2439	81.7215	1.11736	0.0969041	605.748	3.04975	8.878
2008_05_10May\ 84083_05_1@1.ais	84083	5	1	R	3352.33	110.583	0.08522	0.00703	-0.08248	2.64	0.08598	94.9624	1.91392	0.0659665	1262.83	2.14068	8.818
2008_05_10May\ 84083_06_1@.ais	84083	6	1	R	5364.81	290.69	0.1099	0.0149	0.392762	4.94	0.3473	91.7865	1.19513	0.0680777	721.416	2.67482	8.854
2008_05_10May\ 84083_07_1@.ais	84083	7	1	R	2901.07	106.044	0.08711	0.00947	0.248145	2.507	0.1037	94.7199	2.19855	0.0848599	906.068	3.00455	9.03
2008_05_10May\ 84083_08_1int@.ais	84083	8	1	R	2620.55	109.189	0.097	0.0127	0.1167	1.811	0.08008	93.4462	2.39428	0.109351	671.712	3.41954	9.085
2008_05_10May\ 84083_09_1int@.ais	84083	9	1	R	5243.84	219.433	0.1525	0.0154	-0.0877835	4.375	0.2138	86.2997	1.15393	0.0574623	723.739	2.80836	8.798
2008_05_10May\ 84083_10_1Core@.ais	84083	10	1	C	2378.12	134.6	0.1549	0.0219	-0.364241	1.705	0.1122	85.9876	2.42513	0.177398	289.17	3.11446	8.683
2008_05_10May\ 84083_11_1Core@.ais	84083	11	1	C	3327.79	105.315	0.09197	0.00681	0.154896	2.807	0.09346	94.0921	1.90998	0.0633917	1142.28	2.08624	8.966
2008_05_10May\ 84083_11_1int@1.ais	84083	11	1	R	3056.23	76.9663	0.07448	0.00539	0.0256439	2.346	0.07859	96.3426	2.11827	0.0550166	1401.49	1.98866	8.87
2008_05_10May\ 84083_12_1Rim@.ais	84083	12	1	R	4633.92	137.429	0.06842	0.00512	0.307406	0.01457	0.005567	97.1226	1.43838	0.0420522	3460.76	2.07391	8.838
2008_05_10May\ 84083_13_1core@1.ais	84083	13	1	C	4456.33	165.424	0.1032	0.0109	-0.196789	0.006295	0.004787	92.6511	1.4309	0.0578749	1106.98	2.45295	8.81
2008_05_10May\ 84083_15_1core@1.ais	84083	15	1	C	2851.44	75.1278	0.05629	0.00288	0.18838	0.003278	0.002078	98.6865	2.30251	0.0600809	4375.88	1.20901	9.3
2008_05_10May\ 84083_17_1core.ais	84083	17	1	C	2968.24	73.9197	0.05842	0.00397	0.29169	0.003804	0.001382	98.4145	2.22395	0.054972	2973	2.03077	8.892
2008_05_10May\ 84083_20_1rim.ais	84083	20	1	R	3419.97	123.98	0.09501	0.0101	0.206848	0.007578	0.004067	93.7002	1.85801	0.0719634	808.051	2.63887	8.849
2008_05_10May\ 84083_20_2core.ais	84083	20	1	C	3249.92	139.418	0.1395	0.0175	-0.339334	0.05895	0.02422	87.9736	1.83952	0.098531	495.887	3.12885	8.984
2010_06_11June\ DomeD_int_Z@1.ais	Dome D	1	1	R	5010.02	189.507	0.1011	0.0129	-0.162633	n.d.	n.d.	92.9665	1.28865	0.0533036	723.77	3.12677	8.646
2010_06_11June\ DomeD_int_Z@10.ais	Dome D	10	1	R	4506.53	200.651	0.174	0.0171	-0.195517	0.007932	0.005613	83.6438	1.29403	0.0726855	404.087	4.50981	8.555
2010_06_11June\ DomeD_int_Z@12.ais	Dome D	12	1	R	3688.68	131.709	0.1096	0.00875	-0.0724617	0.005481	0.002647	91.8783	1.69721	0.0657447	1072.86	2.97804	8.632
2010_06_11June\ DomeD_int_Z@13.ais	Dome D	13	1	R	3938.56	147.987	0.09234	0.00747	-0.154894	0.007717	0.003153	94.0877	1.62691	0.0638786	1158.22	2.3562	8.488
2010_06_11June\ DomeD_int_Z@14.ais	Dome D	14	1	R	3284.07	211.389	0.3091	0.0383	-0.0199595	0.02361	0.01367	66.3664	1.38973	0.162748	134.138	2.35737	8.564	206Pb* <80%
2010_06_11June\ DomeD_int_Z@15.ais	Dome D	15	1	R	4424.78	142.533	0.08774	0.00995	0.00858989	0.00725	0.003037	94.6734	1.4637	0.0502738	1303.12	2.11145	8.586
2010_06_11June\ DomeD_int_Z@16.ais	Dome D	16	1	R	3261.58	115.953	0.09851	0.00897	-0.0980052	0.00229	0.00162	93.2956	1.94076	0.0741414	1026.48	4.29316	8.623
2010_06_11June\ DomeD_int_Z@2.ais	Dome D	2	1	R	4201.68	183.603	0.1832	0.0229	-0.434817	0.01337	0.006252	82.4724	1.35544	0.0846849	550.419	2.74266	8.474
2010_06_11June\ DomeD_int_Z@3.ais	Dome D	3	1	R	4752.85	181.169	0.1493	0.00949	-0.0118151	0.01461	0.004561	86.7993	1.26555	0.054772	1250.52	2.4979	8.472
2010_06_11June\ DomeD_int_Z@4.ais	Dome D	4	1	R	3052.5	101.564	0.08556	0.00705	0.117358	0.003574	0.001788	94.9524	2.08692	0.0726114	1353.33	1.9112	8.431
2010_06_11June\ DomeD_int_Z@5.ais	Dome D	5	1	R	4675.08	255.72	0.2382	0.0224	-0.0352737	0.01971	0.006583	75.4383	1.12601	0.0871488	810.326	2.2309	8.484	206Pb* <80%
2010_06_11June\ DomeD_int_Z@6.ais	Dome D	6	1	R	4866.18	165.048	0.1131	0.0113	-0.151809	0.006072	0.003508	91.438	1.30054	0.0491585	943.029	2.6197	8.458
2010_06_11June\ DomeD_int_Z@7.ais	Dome D	7	1	R	5017.56	176.231	0.1185	0.00963	0.120955	0.006932	0.003603	90.7372	1.25263	0.047661	1037.48	2.33981	8.535
2010_06_11June\ DomeD_int_Z@8.ais	Dome D	8	1	R	3061.85	104.062	0.09309	0.00693	0.0823619	0.003399	0.001963	93.9877	2.0678	0.0738872	1044.89	2.61384	8.54
2010_06_11June\ DomeD_int_Z@9.ais	Dome D	9	1	R	4541.33	171.382	0.1165	0.01	-0.28255	0.01724	0.005755	90.9966	1.38129	0.0575182	953.789	2.67122	8.449
n.d. = below detection
error correlation for Tera-Wasserburg concordia
age = 206Pb/238U age after 207Pb-correction, and disequilibrium correction (Th/U melt = 2.16)
204Pb/206Pb only reported for comparison
decay constants used:λ232: 4.9475·10-11 a-1; λ235: 9.8485·10-10 a-1; λ238: 1.55125·10-10 a-1
calibration conditions for sessions between 2011/08/14 and 2011/08/26:
reference zircon range in UO/U = 7.17-8.73; external reproducibility of AS3 206Pb/238U age = 2.1 % (1 standard deviation; n = 142); accuracy of secondary reference 91500 = +0.72% (n = 3)
Th+/U+ relative sensitivity = 0.830
U+/94Zr2O+ relative sensitivity = 0.0477 (relative to 91500 zircon with 81.2 ppm U)
for additional data from Atana and Toconao see Schmitt et al. (2003)
